# 1 **Myelin speeds cortical oscillations by consolidating phasic parvalbumin-** 2 **mediated inhibition**

3  
4 **Authors:** Mohit Dubey<sup>1</sup>, Maria Pascual-Garcia<sup>3</sup>, Koke Helmes<sup>1</sup>, Dennis D. Wever<sup>1</sup>, Mustafa S.  
5 Hamada<sup>1, 2</sup>, Steven A. Kushner<sup>3</sup> and Maarten H. P. Kole<sup>1, 2, \*</sup>  
6

7 **Affiliations:** <sup>1</sup>Department of Axonal Signaling, Netherlands Institute for Neuroscience (NIN),  
8 Royal Netherlands Academy of Arts and Sciences (KNAW); Meibergdreef 47, 1105 BA,  
9 Amsterdam, The Netherlands. <sup>2</sup>Cell Biology, Neurobiology and Biophysics, Department of  
10 Biology, Faculty of Science, Utrecht University, Padualaan 8, 3584 CH, Utrecht, The Netherlands.  
11 <sup>3</sup>Department of Psychiatry, Erasmus Medical Centre, Wytemaweg 80, 3015 CN, Rotterdam, The  
12 Netherlands.

13 \*Corresponding author. Email: [m.kole@nin.knaw.nl](mailto:m.kole@nin.knaw.nl)  
14

## 15 **Summary**

16  
17 **Parvalbumin-positive (PV<sup>+</sup>)  $\gamma$ -aminobutyric acid (GABA) interneurons are critically**  
18 **involved in producing rapid network oscillations and cortical microcircuit computations but**  
19 **the significance of PV<sup>+</sup> axon myelination to the temporal features of inhibition remains**  
20 **elusive. Here using toxic and genetic models of demyelination and dysmyelination,**  
21 **respectively, we find that loss of compact myelin reduces PV<sup>+</sup> interneuron presynaptic**  
22 **terminals, increases failures and the weak phasic inhibition of pyramidal neurons abolishes**  
23 **optogenetically driven gamma oscillations *in vivo*. Strikingly, during periods of quiet**  
24 **wakefulness selectively theta rhythms are amplified and accompanied by highly**  
25 **synchronized interictal epileptic discharges. In support of a causal role of impaired PV-**  
26 **mediated inhibition, optogenetic activation of myelin-deficient PV<sup>+</sup> interneurons attenuated**  
27 **the power of slow theta rhythms and limited interictal spike occurrence. Thus, myelination**  
28 **of PV axons is required to consolidate fast inhibition of pyramidal neurons and enable**  
29 **behavioral state-dependent modulation of local circuit synchronization.**  
30  
31

## 32 **Introduction**

33 GABAergic interneurons play fundamental roles in controlling rhythmic activity patterns and the  
34 computational features of cortical circuits. Nearly half of the interneuron population in the  
35 neocortex is parvalbumin-positive (PV<sup>+</sup>) and comprised mostly of the basket-cell (BC) type <sup>1,2</sup>.  
36 PV<sup>+</sup> BCs are strongly and reciprocally connected with pyramidal neurons (PNs) and other  
37 interneurons, producing temporally precise and fast inhibition <sup>3-5</sup>. The computational operations  
38 of PV<sup>+</sup> BCs, increasing gain control, sharpness of orientation selectively and feature selection in  
39 the sensory cortex <sup>6-10</sup> are mediated by a range of unique molecular and cellular specializations.  
40 Their extensive axon collaterals targeting hundreds of PNs, are anatomically arranged around the  
41 soma and dendrites, electrotonically close to the axonal output site and the unique calcium (Ca<sup>2+</sup>)  
42 sensors in PV<sup>+</sup> BCs terminals, synaptotagmin 2 (Syt2), are tightly coupled to Ca<sup>2+</sup> channels  
43 mediating fast and synchronized release kinetics <sup>11,12</sup>, powerfully shunting excitatory inputs and  
44 increasing the temporal precision of spike output <sup>2,5,13,14</sup>.

45  
46 Recent findings have shown that the proximal axons of PV<sup>+</sup> interneurons are covered by myelin  
47 sheaths <sup>5,13,15-18</sup>. How interneuron myelination defines cortical inhibitory interneuron functions  
48 remains, however, still poorly understood. Myelination of axons provides critical support for long-  
49 range signaling by reducing the local capacitance, producing saltatory conduction and by  
50 maintaining the axonal metabolic integrity <sup>19,20</sup>. For PV<sup>+</sup> BCs, however, the average path length  
51 between the axon initial segment (AIS) and release sites involved in local circuit inhibition is  
52 typically less than ~200 μm <sup>5,21,22</sup> and theoretical and experimental studies indicate the acceleration  
53 by myelin may play only a limited role in tuning inhibition <sup>16,22</sup>. Another notable long-standing  
54 hypothesis is that myelination of PV<sup>+</sup> axons may be critical for the security and synchronous  
55 invasion of presynaptic terminals <sup>13</sup>. In support of a role in reliability, in Purkinje cell axons of the

56 long Evans shaker (*les*) rat, which carries a deletion of *Mbp*, spike propagation shows failures and  
57 presynaptic terminals are disrupted<sup>23</sup>. Interestingly, in a genetic model in which oligodendrocyte  
58 precursor cells lack the  $\gamma 2$  GABA<sub>A</sub> receptor subunit, fast-spiking interneuron axons in the  
59 neocortex become aberrantly hypermyelinated and proper feedforward inhibition is also impaired  
60<sup>24</sup>. At the network level PV<sup>+</sup> BC-mediated feedback and feedforward inhibition produces local  
61 synchronization of PN and interneuron firing at the gamma ( $\gamma$ ) frequency bandwidth which is a  
62 key rhythm binding information from cell assemblies, allowing synaptic plasticity and higher  
63 cognitive processing of sensory information<sup>2,8,25–27</sup>. Here we directly addressed whether PV<sup>+</sup> BC  
64 driven cortical rhythms require myelination by longitudinally examining the frequency spectrum  
65 of cortical oscillations in de- and dysmyelination models and studying the properties and role of  
66 genetically labelled PV<sup>+</sup> BCs.

67

## 68 **Results**

69 *Behavioral state-dependent increase in theta power and interictal epileptiform discharges.*

70 We investigated the cortical rhythms by recording *in vivo* local field potential (LFP) in layer 5  
71 (L5) together with the electrocorticogram (ECoG) from both primary somatosensory (S1) and  
72 visual (V1) areas. Freely moving mice (C57BL/6) were recorded during home cage explorative  
73 behaviors every second week (18–24 hours/week) across an 8-week cuprizone treatment, inducing  
74 toxic loss of oligodendrocytes in white- and gray matter including the sensory cortex<sup>28–30</sup>.  
75 Remarkably, after 6 weeks of cuprizone feeding we detected high-voltage spike discharges (~5  
76 times the baseline voltage and ~50–300 ms in duration, **Fig. 1a-c**). These brief spike episodes on  
77 the ECoG and LFP (**Fig. 1c**) occurred bilaterally and near synchronously in S1 and V1, resembling  
78 the interictal epileptiform discharges (also termed interictal spikes) that are a hallmark of epilepsy  
79<sup>31–34</sup>. Automated detection of interictal spikes in the raw ECoG–LFP signal was performed with a

80 machine-based learning classifier (see Supplementary **Fig. S1a** and **Methods**), revealing a  
81 progressively increasing interictal spike rate from ~5/hour at 4 weeks up to ~70/hour at 8 weeks  
82 (**Fig. 1d**). Importantly, interictal spikes were highly dependent on vigilance state and present  
83 exclusively during quiet wakefulness (30 out of 30 randomly selected LFP segments from awake  
84 or quiet wakefulness, Chi-squared test  $P < 0.0001$ ,  $n = 6$  cuprizone mice), with no other discernible  
85 association to specific behaviors (Supplementary **Fig. S1b** and **Movie S1**). Whether the aberrant  
86 cortical oscillations were specific to certain frequency bands, including gamma ( $\gamma$ , 30-80 Hz), was  
87 examined by plotting the power spectrum density of the LFP in S1 during periods of quiet  
88 wakefulness or active movement (**Fig. 1e**). In cuprizone-treated mice LFP power was selectively  
89 amplified during quiet wakefulness in the theta frequency band ( $\theta$ , 4-12 Hz, **Fig. 1e-f**, and  
90 Supplementary **Fig. S1c**). In contrast, during active states when mice were moving and exploring  
91 no differences were observed in the power spectrum, in none of the frequency bands (**Fig. 1e, f**).  
92 Finally, to examine whether interictal epileptiform discharges are due to off-target effects of  
93 cuprizone treatment the dysmyelinated *shiverer* mice (*Mbp*<sup>Shi</sup>), lacking compact myelin due to a  
94 truncating mutation in *Mbp*<sup>35</sup> were recorded at the age of 8 weeks. *Shiverer* mice suffer  
95 progressively increasing number of epileptic seizures beginning at approximately 8 weeks of age  
96 <sup>35,36</sup> and while ictal discharges were observed at that age, the mice also exhibited interictal spikes  
97 with a rate of ~60/hour, comparable to cuprizone-treated mice but with substantially longer  
98 duration (~100–500 ms, **Fig. 1g-h** and **Fig. S1d**).

99

#### 100 *Loss of myelin impairs fast PV<sup>+</sup> BC-mediated inhibition*

101 Increased power of sensory-driven slow oscillations and epileptiform activity is also observed  
102 when PV<sup>+</sup> interneurons are optogenetically silenced <sup>10,25,37</sup>. To investigate how myelin loss affects  
103 PV<sup>+</sup> interneurons we crossed the *PV-Cre* mouse line, with Cre recombinase expression limited to

104 *Pvalb* expressing cells, crossed with tdTomato (*Ail4*) reporter mice (*PV-Cre; Ail4*). The  
105 cytoplasmic fluorescence allowed quantification of PV<sup>+</sup> cell bodies and their processes in the  
106 primary somatosensory cortex (**Fig. 2a, b** and Supplementary **Fig. S2a**) and immunofluorescent  
107 labelling with myelin basic protein (MBP) revealed substantial myelination of PV<sup>+</sup> axons (80.15  
108 ± 9.95% along 83 mm of PV<sup>+</sup> axons analyzed,  $n = 3$  slices from 2 mice, z-stack with a volume of  
109  $7.66 \times 10^5 \mu\text{m}^3$ , (**Fig. 2b** and **Fig. S2a**). Electron microscopy (EM) immunogold-labeled tdTomato  
110 showed multi-lamellar compact myelin sheaths (on average,  $6.33 \pm 0.80$  myelin lamella) with  $10.8$   
111 ± 0.76 nm distance between the major dense lines and a mean *g*-ratio (axon diameter/fiber  
112 diameter) of  $0.74 \pm 0.01$  ( $n = 6$  sheaths, **Fig. 2c**). *PV-Cre; Ail4* mice fed with 0.2% cuprizone for  
113 6 weeks showed strongly reduced MBP in S1 and PV<sup>+</sup> axons were largely devoid of myelin (**Fig.**  
114 **2a-b** and **Fig. S2b**) while the number of PV<sup>+</sup> cells across the cortical layers remained constant  
115 (control,  $326 \pm 14$  cells  $\text{mm}^{-2}$  vs. cuprizone,  $290 \pm 48$  cells  $\text{mm}^{-2}$ ,  $n = 6$  sections from  $N = 6$   
116 animals/group, Mann-Whitney test  $P = 0.1649$ , **Fig. 1d**). Biocytin-filled PV-Cre<sup>+</sup> interneurons  
117 were re-sectioned and stained for MBP to identify the location of myelin and the axon morphology  
118 (**Fig. 2e** and **Fig. S2c, d**). Myelin was present on multiple and proximal segments of all control  
119 BCs (4/4), not on BCs from cuprizone treated mice (0/6), and the total number of axon segments  
120 (~80 per axon, Mann-Whitney test,  $P = 0.3032$ , **Fig. 2f**) as well as the total path length were  
121 unaffected by cuprizone treatment (nearly ~4 mm in each group, Mann-Whitney test,  $P = 0.9871$ ,  
122 **Fig. 2g**, Supplementary **Fig. S2c-f**).

123 To examine whether myelin loss changes PV<sup>+</sup> BC excitability, we made whole-cell  
124 recordings in slices from *PV-Cre; Ail4* mice (**Fig. 2h**). Recording of steady-state firing properties  
125 by injecting increasing steps of currents injections revealed an increase in the rheobase (~90 pA,  
126 **Fig. 2i-j**) and ~50 Hz reduced firing frequency during low amplitude current injections (two-way  
127 ANOVA, treatment  $P = 0.0441$ , Šidák's multiple comparison *post hoc* test at 200 pA;  $P = 0.0382$ ,

128 250 pA;  $P = 0.0058$ , 300 pA;  $P = 0.0085$ ) without a change in the maximum rates (two-way  
129 ANOVA, Šidák's multiple comparison *post hoc* test,  $P = 0.92$ , data not shown) and neither the AP  
130 half-width nor amplitude ( $P = 0.7113$  and  $P = 0.4358$ , respectively, **Table S1**). The resting  
131 membrane potential ( $V_{RMP}$ ) of control PV<sup>+</sup> interneurons was on average ~4 mV more  
132 hyperpolarized following cuprizone treatment (**Fig. 2k, Table S1**) without a change in the apparent  
133 input resistance ( $P = 0.5952$ , **Table S1**). In addition to the hyperpolarization in  $V_{RMP}$ , demyelinated  
134 PV<sup>+</sup> interneurons also had a ~3 mV more hyperpolarized voltage threshold (Mann-Whitney test  $P$   
135 = 0.0269, **Table S1**). Together, the results indicate that cuprizone treatment demyelinate PV<sup>+</sup>  
136 interneuron axons without affecting anatomical properties and reduces the intrinsic interneuronal  
137 excitability.

138 Is myelin required for PV<sup>+</sup> BC-mediated inhibition? By recording from L5 PNs several  
139 indications showed a putative impaired net inhibition. The miniature inhibitory postsynaptic  
140 currents (mIPSCs) recorded at the soma of L5 PNs were significantly reduced in peak amplitude  
141 (from ~20 to ~7 pA,  $P = 0.002$ ) without a change in frequency (Supplementary **Fig. S3a–c**).  
142 Furthermore, the number of PV<sup>+</sup> puncta was 40% reduced both at the somatic sites and along the  
143 primary apical dendrite and accounted to a large extent for the overall reduction in  
144 immunofluorescent signals (Supplementary **Fig. S3d–i**). Interestingly, in contrast to the loss of  
145 perisomatic PV<sup>+</sup> BC puncta, putative PV<sup>+</sup> chandelier cell inputs identified by co-staining PV with  
146 the AIS marker βIV-spectrin, were preserved (~8 puncta/AIS, Mann-Whitney test  $P = 0.96$ ,  
147 Supplementary **Fig. S3j–k**). Furthermore, staining for Syt2, a Ca<sup>2+</sup> sensor protein selective for PV<sup>+</sup>  
148 presynaptic terminals<sup>11,38</sup> similarly showed a ~35% reduction (**Fig. S4a–b**). Syt2<sup>+</sup> puncta analysis  
149 in the dysmyelinated *shiverer* mouse line also showed a reduced number of Syt2<sup>+</sup> puncta at L5 PN  
150 somata and a reduced frequency of mIPSCs ( $P = 0.019$ , **Fig. S4c–g**), indicating that compact  
151 myelin is required for both maintaining as well as developing PV<sup>+</sup> BC presynaptic terminals.

152 Single PV<sup>+</sup> BCs typically make 5 to 15 synapses with a PN in a range of < 200  $\mu\text{m}$ , forming  
153 highly reliable, fast and synchronized release sites <sup>5,14,22,39</sup>. We hypothesized that in addition to  
154 reduced excitability (**Fig. 2**) and PV<sup>+</sup> BC release sites (Supplementary **Figs. S3** and **S4**) APs may  
155 fail to forward propagate along PV<sup>+</sup> BC axons. To examine this question directly, we made paired  
156 recordings of PV<sup>+</sup> BCs and L5 PNs in *PV-Cre; Ai14* mice, evoking APs in PV<sup>+</sup> interneurons while  
157 recording unitary inhibitory post-synaptic currents (uIPSCs) in L5 PNs under conditions of  
158 physiological Ca<sup>2+</sup>/Mg<sup>2+</sup> (2.0/1.0 mM in  $n = 78$  pairs, **Fig. 3a, b**). Concordant with optogenetic  
159 mapping of PV<sup>+</sup> inputs onto L5 PNs in mouse S1 <sup>39</sup>, the probability of a given PV<sup>+</sup> cell being  
160 connected to a nearby PN was high ( $\sim 0.48$ , **Fig. 3c**). In contrast, the connection probability was  
161 significantly lower in cuprizone-treated mice ( $\sim 0.23$ , Chi-squared test  $P < 0.0182$ , **Fig. 3b, c**). In  
162 thirteen stable connected pairs, we examined unitary IPSC properties including failure rate and  
163 amplitude, as well as rise- and decay time, using automated fits of the uIPSCs ( $n > 80$  trials per  
164 connection, **Fig. 3d**). Cuprizone treatment led to a significant increase in the number of failures  
165 (from 0.05 to 0.26, **Fig. 3e**) and a  $\sim 2.5$ -fold reduction in the average uIPSC peak amplitude (**Fig.**  
166 **3f**). Finally, to obtain an estimate of propagation speed, we determined on successful trials the  
167 latency between the AP peak and uIPSCs at 10% peak amplitude (**Fig. 3d**). Interestingly, both the  
168 mean latency was unchanged between groups ( $\sim 800 \mu\text{s}$ ; Mann-Whitney test  $P > 0.999$ , **Fig. 3f-g**)  
169 as well as the trial-to-trial latency variability (SD in cuprizone  $319 \pm 65 \mu\text{s}$ ,  $n = 7$  pairs, SD in  
170 control,  $276 \pm 38 \mu\text{s}$ ,  $n = 5$  pairs,  $P > 0.60$ ).

171 To further examine the properties of GABA release in demyelinated PV-BCs we recorded  
172 uIPSCs during a train of five APs at 100 Hz (averaging > 50 trials, **Fig. 3h**). Like the temporary  
173 facilitation in IPSCs of adult Purkinje neurons <sup>40</sup>, uIPSC recordings in control PV BCs showed  
174 that paired-pulse ratios were on the second spike facilitated by 20% (uIPSC<sub>2</sub>/uIPSC<sub>1</sub>  $1.20 \pm 0.060$ )  
175 and gradually depressed on the subsequent spikes (3 to 5). In contrast, in cuprizone-treated mice

176 uIPSC were depressed during the second and subsequent pulses (uIPSC<sub>2</sub>/uIPSC<sub>1</sub>  $0.89 \pm 0.041$ , **Fig.**  
177 **3h**,  $P = 0.034$ ). The uIPSC failures and impairment of temporary facilitation may reflect failure of  
178 AP propagation, changes in release probability or a lower number of active release sites ( $< 5$ , Refs.  
179 <sup>5,14</sup>) as observed in L5 neurons (**Fig. S3**). To test whether release sites along single PV<sup>+</sup> BC axons  
180 are changed we performed Syt2 immunolabeling of biocytin-filled PV<sup>+</sup> BCs (**Fig. 3i**). Cuprizone  
181 treatment reduced the density of Syt2<sup>+</sup> puncta by 2-fold (cuprizone,  $\sim 1$  Syt2<sup>+</sup> puncta per 10  $\mu\text{m}$  vs.  
182 1 Syt2<sup>+</sup> puncta per 5  $\mu\text{m}$  in control, Mann-Whitney test  $P < 0.0001$ , **Fig. 3j-k**). Thus, myelin loss  
183 reduces the presynaptic sites, increasing failures and a frequency-dependent depression limiting  
184 fast inhibition.

185

186 *PV<sup>+</sup> activation rescues interictal spikes and theta oscillations, but not the loss of gamma*

187 To examine the reduced fast PV<sup>+</sup> inhibition at the network level, we used AAV1-mediated delivery  
188 of Cre-dependent channelrhodopsin-2 (ChR2) into L5 of *PV-Cre; Ai14* mice (**Fig. 4a, b** and  
189 Supplementary **Fig. S5a-c**). The ChR2 transduction rate was comparable between control and  
190 cuprizone mice ( $\sim 70\%$ , **Fig. 4a, Fig. S5b**). In acute slices, we voltage-clamped L5 PNs and  
191 optogenetically evoked IPSC (oIPSC) with full-field blue light illumination. Consistent with S1  
192 L5 pyramidal neurons receiving converging input from  $>100$  PV<sup>+</sup> interneurons<sup>39</sup>, control oIPSCs  
193 rapidly facilitated to a peak amplitude of  $\sim 700$  pA followed by rapid synaptic depression (**Fig. 4c**).  
194 In slices from cuprizone mice, however, the oIPSC peak amplitude was  $\sim 2$ -fold reduced ( $P =$   
195  $0.036$ , **Fig. 4c**) while neither the steady-state amplitude during vesicle replenishment was not  
196 changed (**Fig. 4d**) and neither the total charge transfer reached significant difference (Control,  $-$   
197  $99.58 \pm 28.5$  pC vs. cuprizone,  $-54.3 \pm 20.57$  pC,  $P = 0.236$ ,  $n = 9$  control and  $n = 8$  cuprizone  
198 neurons). On the other hand, miniature EPSCs recorded from PV<sup>+</sup> interneurons of controlled and  
199 cuprizone-treated mice showed no changes in peak amplitude nor frequency (Supplementary **Fig.**



200 **S6**), in keeping with the preservation of excitatory inputs onto L5 PNs following cuprizone-  
201 induced demyelination<sup>29</sup>.

202 Impaired phasic inhibition predicts a lower power in  $\gamma$  rhythm<sup>8,26</sup>. Although  $\gamma$  power during  
203 home cage activity was not noticeably reduced (**Figs. 1e-f**) we examined the extent of  $\gamma$  modulation  
204 by leveraging optogenetic activation of PV<sup>+</sup> interneurons with AAV1-hChR2-YFP by introducing  
205 a laser fiber into L5 and recording the LFP (**Fig. 4f**). Evoking brief pulses of blue light (1 ms, 30  
206 Hz) showed that local circuit currents were modulated and phase-locked activity in the low  $\gamma$  band  
207 (between 25 and 40 Hz) of control mice (**Fig. 4g, h** and **Fig. S6**). In striking contrast, no modulation  
208 or entrainment was observed in cuprizone-treated mice (**Fig. 4i-j**, Supplementary **Fig. S6**). Could  
209 the diminished PV<sup>+</sup> BC activity cause the emergence of interictal spikes during quiet wakefulness  
210 behaviors? To test the direct contribution of PV<sup>+</sup> BCs in amplifying  $\theta$  rhythm and interictal spikes,  
211 we activated ChR2 for 1 s duration pulses in *PV-Cre; Ai14* mice to generate tonic GABA release  
212 (**Fig. 5a**, **Movie S2** and Supplementary **Fig. S5c**). In cuprizone-treated mice we found that  
213 optically driving PV<sup>+</sup> interneurons normalized the LFP power in the  $\theta$  band to control levels,  
214 without affecting  $\delta$ ,  $\beta$ , and  $\gamma$  rhythms (two-way ANOVA  $P = 0.0124$ , light on vs. off,  $\delta$ ;  $P =$   
215  $0.9975$ ,  $\theta$ ;  $P = 0.00076$ ,  $\beta$ ;  $P = 0.9481$ ,  $\gamma$ ;  $P = 0.9998$ , **Fig. 5a-c**). Furthermore, activation of blue  
216 light significantly reduced the frequency of interictal epileptic discharge frequency ( $P = 0.0089$ ,  
217 **Fig. 5d-e**). The normalization of cortical rhythms by elevating sustained PV<sup>+</sup> mediated activity  
218 suggests that GABA<sub>A</sub> receptors are insufficiently activated in the demyelinated cortex. Finally, to  
219 examine the role of GABA<sub>A</sub> receptors agonism in dampening global interictal spikes we  
220 administered a non-sedative dose of diazepam (2 mg/kg i.p.), an allosteric modulator of post-  
221 synaptic GABA<sub>A</sub> receptors, in cuprizone-treated mice (8-week treatment). The results showed that  
222 diazepam significantly suppressed the interictal epileptiform discharges in cuprizone mice (**Fig. 5f**  
223 and Supplementary **Fig. S7a, b**).

224

## 225 **Discussion**

226 In this study we identified that the cellular microarchitecture of myelination of PV<sup>+</sup> BCs  
227 contributes to fast gamma frequencies and limits the power of slow oscillations and interictal  
228 spikes during quiet wakefulness. Interictal discharges identified as spikes on the EEG are an  
229 important diagnostic criterium in epilepsy and reflect hypersynchronized burst firing of pyramidal  
230 neurons and interneurons<sup>32,33,41</sup>. The brief episodic and generalized nature of EEG spikes we  
231 recorded in both demyelinated and dysmyelinated cortex (~50 to 500 ms at ~1/minute) resemble  
232 interictal spikes reported in epilepsy models<sup>41,42</sup> and are concordant with recordings in the  
233 hippocampus of cuprizone-treated mice by Hoffmann et al.<sup>34</sup>. Here we extend our insights into  
234 interictal spikes by showing spatiotemporal synchronization across cortical areas and hemispheres  
235 and their selective manifestation during the vigilance state of quiet wakefulness. During brain  
236 states of quiescence, for example when whiskers are not moving, whole-cell *in vivo* recordings in  
237 the barrel cortex reveals large-amplitude membrane potential fluctuations of PN and interneurons  
238 temporally highly synchronized at a low frequency (<10 Hz) and fast-spiking PV<sup>+</sup> interneurons  
239 are dominating action potential firing<sup>43,44</sup>. These slow rhythms are internally generated and their  
240 selective amplification during quiet wakefulness is consistent with our finding of reduced intrinsic  
241 excitability of PV<sup>+</sup> BCs and deficiency of fast inhibitory transmission in the demyelinated cortex  
242 (**Figs. 2, 3**). Consistent with the notion that PV<sup>+</sup> dysfunction suffices to amplify low frequency  
243 oscillations, in the normally myelinated cortex optogenetic inhibition of PV<sup>+</sup> interneurons causes  
244 an increase of PN firing rates, elevating the power of slow oscillations and triggers epileptiform  
245 activity<sup>10,25,37</sup>. A major limitation of the experimental toolbox available to investigate myelination  
246 is the lack of axon- or cell-type selectivity. Whether amplified delta- and abolished gamma-  
247 frequency oscillations are the consequence of PV<sup>+</sup> axon demyelination, the loss of excitatory axon

248 myelination or the combination thereof, remains to be further examined when more refined  
249 methods become available to interrogate oligodendroglial myelination of specific cell types. In the  
250 absence of such strategies, however, our *in vivo* experiments optogenetically driving PV<sup>+</sup>  
251 interneurons or activating GABA<sub>A</sub> receptors (**Fig. 5**) uncovers important evidence for an  
252 interneuron origin of the amplified slow oscillations and epileptic discharges. Interestingly, in  
253 contrast to dampening theta oscillations driving myelin-deficient PV<sup>+</sup> interneurons at gamma-  
254 frequencies did not entrain local field oscillations. This may suggest that for gamma precisely  
255 timed spike generation of PV<sup>+</sup> BCs alone is insufficient and further requires a specific circuit  
256 connectivity, GABA release dynamics or require myelination of the proximal arbors which is lost  
257 in cuprizone-treated mice. In future studies this could be examined by exploring whether  
258 remyelination reinitiates the ability of PV<sup>+</sup> interneurons to produce gamma frequencies.

259

### 260 *Myelination of PV<sup>+</sup> axons determine synapse assembly and maintenance*

261 The prominent role of myelination of PV<sup>+</sup> BCs to shape brain state-dependent rhythms is surprising  
262 in view of its sparse distribution in patches of ~25 μm and being distributed across <10% of the  
263 total axon length<sup>16,22,45</sup> (**Fig. 2** and **S2**). The sparseness of interneuron myelination raised the  
264 question whether myelin speeds conduction velocity in these axon types<sup>16,45,46</sup>. In a genetic mouse  
265 model with hypermyelinated fast-spiking interneurons the calculated conduction velocity is  
266 reduced<sup>24</sup>. Here we find that the average uIPSC latency (~800 μs) was similar between myelinated  
267 and completely demyelinated axons, and well within range of previous paired recordings between  
268 normally myelinated PV<sup>+</sup> BC and PNs (700–900 μs,<sup>47,48</sup>). Assuming a typical axonal path length  
269 of ~200 μm between the AIS and presynaptic terminals contacting a PN, combined with a ~250  
270 μs delay for transmitter release, the calculated conduction velocity would be 0.4 m s<sup>-1</sup>, consistent  
271 with optically recorded velocities (~0.5 m s<sup>-1</sup>, ref.<sup>49</sup>). Our paired recordings, made near

272 physiological temperature (34 – 36 °C), may have had a limited resolution to detect temporal  
273 differences and are not excluding changes in the order of microseconds. In future studies other  
274 approaches will be required such as simultaneous somatic and axonal whole-cell recording<sup>50</sup>  
275 and/or high-resolution myelin analysis along single axon paths, which recently showed a  
276 correlation with conduction velocity<sup>22</sup>. Another constraint is the lack of information on the nodes  
277 of Ranvier along demyelinated PV<sup>+</sup> BC axons. With aberrant interneuron myelin development,  
278 including myelination of branch points the formation of nodes of Ranvier is strongly disrupted  
279<sup>24</sup>. Reorganization of nodal domains also occurs with the loss of myelin, affecting action potential  
280 propagation<sup>51,52</sup> and how interneuron myelin loss changes the nodal channel distribution needs to  
281 be examined in future studies.

282           Converging evidence from the two distinct models (*shiverer* and cuprizone) shows that  
283 interneuron myelination critically determines PV<sup>+</sup> release site number, dynamics and connection  
284 probability (**Fig. 3** and **S4**) and is concordant with the observed synapse loss along Purkinje axons  
285 of the *les* rat<sup>23</sup>. The molecular mechanisms how myelination of proximal axonal segments  
286 establishes and maintains GABAergic terminals in the higher-order distal axon collaterals remains  
287 to be further investigated. The myelin sheath of PV<sup>+</sup> interneurons contains high levels of non-  
288 compact 2',3'-cyclic nucleotide 3'-phosphodiesterase (CNP) protein<sup>16,53</sup>, which is part of the  
289 inner cytoplasmic inner mesaxon<sup>54</sup>. One possible mechanism may be that in the absence of inner  
290 cytoplasmic loops of oligodendroglial myelin, interneuron axons lack sufficient trophic support<sup>55</sup>.  
291 In support of this idea, amyloid precursor protein, a marker of disrupted axonal transport, has been  
292 observed in early phases of cuprizone treatment and in multiple sclerosis (MS)<sup>56–58</sup>. Another  
293 possibility is the pruning of GABAergic synaptic terminals by microglia<sup>59–61</sup>. Microglia become  
294 increasingly activated already in sub-demyelinating stages within the first week of cuprizone  
295 treatment<sup>62,63</sup>, and in aged *Mbp*<sup>+/-</sup> mice<sup>64</sup>. In future studies it needs to be examined whether

296 attenuation of microglia activation could protect against PV<sup>+</sup> synapse loss and interictal  
297 epileptiform discharges.

298  
299 *Implications for cognitive impairments in gray matter diseases*

300 The identification of a cellular origin for interictal spikes may shed light to the role of PV<sup>+</sup> axon  
301 myelination in cognitive impairments in MS <sup>65</sup> and possibly other neurological disorders. In  
302 models of epilepsy and patients interictal spikes have been closely linked to disruptions of the  
303 normal physiological oscillatory dynamics such as ripples required to encode and retrieve  
304 memories <sup>32,42,66,67</sup>. Interictal epileptic discharges are also a prominent hallmark in other cognitive  
305 diseases, including Alzheimer <sup>68</sup>. Notably, reduced gray matter myelination and oligodendroglia  
306 disruption are reported in multiple epilepsy models and recently in Alzheimer <sup>69,70</sup>. Therefore, the  
307 cellular and circuit functions controlled by PV<sup>+</sup> interneurons may represent a common mechanism  
308 for memory impairments in neurological disease encompassing myelin pathology. In support of  
309 this idea, neuropathological studies in MS show a specific loss of PV<sup>+</sup> interneuron synapses in  
310 both cortex and hippocampus <sup>60,71</sup>. In MS patients increased connectivity and synchronization in  
311 delta and theta band rhythms during resting state or task-related behavior have been reported <sup>72,73</sup>  
312 and low GABA levels in sensorimotor and hippocampal areas are correlated with impairments of  
313 information processing speed and memory <sup>74,75</sup>. Taken together with the present work, enhancing  
314 PV<sup>+</sup> interneuron myelination, and thereby strengthening fast inhibition, may provide important  
315 new therapeutic avenues to improve cognition.

316  
317  
318  
319

## 320 **Methods**

321

### 322 ***Animals***

323 We crossed *PV-Cre* (B6;129P2-*Pvalb*<sup>tm1(cre)Arbr</sup>/J, Stock No: 008069, Jackson laboratories) with  
324 *Ai14* reporter mice (B6;129S6-*Gt(ROSA)26Sor*<sup>tm14(CAG-tdTomato)Hze</sup>/J, Stock No: 007908, Jackson  
325 laboratories). For other experiments we used C57BL/6 mice (Janvier Labs, Saint-Berthevin Cedex,  
326 France). Shiverer mice were obtained from Jackson (C3Fe.SWV-*Mbp*<sup>shi</sup>/J Stock No: 001428) and  
327 backcrossed with C57BL/6 for >10 generations. All mice were kept on a 12:12 h light-dark cycle  
328 (lights on at 07 am, lights off at 19 pm) with ad libitum food and water. For cuprizone treatment  
329 either *PV-Cre;Ai14* or C57BL/6 male or female mice, from 7 to 9 weeks of age, were fed *ad libitum*  
330 with normal chow food (control group) or were provided 0.2% (w/w) cuprizone  
331 (Bis(cyclohexanone)oxaldihydrazone, C9012, Merck) added either to grinded powder food or to  
332 freshly prepared food pellets (cuprizone group). Cuprizone-containing food was freshly prepared  
333 during every 2<sup>nd</sup> or 3<sup>rd</sup> day for the entire duration of the treatment (6–9 weeks). The average  
334 maximum weight loss during cuprizone feeding was ~11% ( $n = 31$ ). All animal experiments were  
335 done in compliance with the European Communities Council Directive 2010/63/EU effective from  
336 1 January 2013. The experimental design and ethics were evaluated and approved by the national  
337 committee of animal experiments (CCD, application number AVD 80100 2017 2426) and the  
338 specific experimental protocols were approved and monitored under supervision of animal welfare  
339 body (IvD, protocol numbers; NIN17.21.04, NIN18.21.02, NIN18.21.05, NIN19.21.04 and,  
340 NIN20.21.02) of the Royal Netherlands Academy of Arts and Science (KNAW).

341

342

### 343 ***In vitro electrophysiology***

344 Mice were briefly anaesthetized with 3% isoflurane and decapitated or received a terminal dose of  
345 pentobarbital natrium (5 mg kg<sup>-1</sup>) and were transcardially perfused with ice-cold artificial CSF  
346 (aCSF) of the composition (in mM): 125 NaCl, 3 KCl, 25 glucose, 25 NaHCO<sub>3</sub>, 1.25 Na<sub>2</sub>H<sub>2</sub>PO<sub>4</sub>,  
347 1 CaCl<sub>2</sub>, 6 MgCl<sub>2</sub>, 1 kynurenic acid, saturated with 95% O<sub>2</sub> and 5% CO<sub>2</sub>, pH 7.4. After  
348 decapitation, the brain was quickly removed from the skull and parasagittal sections (300 or 400  
349 μm) containing the S1 cut in ice-cold aCSF (as above) using a vibratome (1200S, Leica  
350 Microsystems). After a recovery period for 30 min at 35 °C brain slices were stored at room  
351 temperature. For patch-clamp recordings, slices were transferred to an upright microscope

352 (BX51WI, Olympus Nederland) equipped with oblique illumination optics (WI-OBCD; numerical  
353 aperture, 0.8). The microscope bath was perfused with oxygenated (95% O<sub>2</sub>, 5% CO<sub>2</sub>) aCSF  
354 consisting of the following (in mM): 125 NaCl, 3 KCl, 25 D-glucose, 25 NaHCO<sub>3</sub>, 1.25 Na<sub>2</sub>H<sub>2</sub>PO<sub>4</sub>,  
355 2 CaCl<sub>2</sub>, and 1 MgCl<sub>2</sub>. L5 pyramidal neurons were identified by their typical large triangular shape  
356 in the infragranular layers and in slices from *PV-Cre;Ail4* mice the PV<sup>+</sup> interneurons expressing  
357 tdTomato were identified using X-Cite series 120Q (Excelitas) with a bandpass filter (excitation  
358 maximum 554 nm, emission maximum 581 nm). Somatic whole-cell current-clamp recordings  
359 were made with a bridge current clamp amplifier (BVC-700A, Dagan Corporation, US) using  
360 patch pipettes (4–6 MΩ) filled with a solution containing (in mM): 130 K-gluconate, 10 KCl, 4  
361 Mg-ATP, 0.3 Na<sub>2</sub>-GTP, 10 HEPES, and 10 Na<sub>2</sub>-phosphocreatine, pH 7.4, adjusted with KOH, 280  
362 mOsmol/kg, to which 10 mg mL<sup>-1</sup> biocytin was added. Voltage was analog low-pass filtered at 10  
363 kHz (Bessel) and digitally sampled at 50–100 kHz using an analog-to-digital converter (ITC-18,  
364 HEKA Electronic) and data acquisition software Axograph X (v.1.7.2, Axograph Scientific). The  
365 access resistance was typically < 20 MΩ and fully compensated for bridge balance and pipette  
366 capacitance. All reported membrane potentials were corrected for experimentally determined  
367 junction potential of -14 mV. Analysis for the electrophysiological properties includes PV  
368 interneuron recordings from cells in normal ACSF and in the presence of CNQX and d-AP5 with  
369 high chloride intracellular solution (see below).

370

### 371 ***mIPSC and mEPC recordings***

372 Whole-cell voltage-clamp recordings were made with an Axopatch 200B amplifier (Molecular  
373 Devices). Patch pipettes with a tip resistance of 3–5 MΩ were pulled from thin wall borosilicate  
374 glass. During recording, a holding potential of -74 mV was used. Both the slow- and fast pipette  
375 capacitance compensation were applied, and series-resistance compensated to ~80-90%. Patch  
376 pipettes were filled with high chloride solution containing (in mM): 70 K-gluconate, 70 KCl, 0.5  
377 EGTA, 10 HEPES, 4 MgATP, 4 K-phosphocreatine, 0.4 GTP, pH 7.3 adjusted with KOH, 285  
378 mOsmol kg<sup>-1</sup> and IPSCs isolated by the presence of the glutamate receptor blockers 6-cyano-7-  
379 nitroquinoxaline-2,3-dione (CNQX, 20 μM), d-2-Amino-5-phosphonovaleric acid (d-AP5, 50  
380 μM) and the sodium (Na<sup>+</sup>) channel blocker tetrodotoxin (TTX, 1 μM Tocris). Individual traces (5  
381 sec duration) were filtered with a high-pass filter of 0.2 Hz and decimated in Axograph software.  
382 Chart recordings of mIPSCs were analyzed with a representative 30 ms IPSC template, using the  
383 automatic event detection tool of Axograph. Detected events were aligned and averaged for further

384 analysis of inter-event intervals (frequency) and peak amplitude. For mEPSC recordings from PV<sup>+</sup>  
385 interneurons we filled patch pipettes with a solution containing (in mM): 130 K-gluconate, 10 KCl,  
386 4 Mg-ATP, 0.3 Na<sub>2</sub>-GTP, 10 HEPES, and 10 Na<sub>2</sub>-phosphocreatine, pH 7.4, adjusted with KOH,  
387 280 mOsmol/kg and both gabazine (4 μM) and TTX (1 μM) were added to the bath solution. The  
388 mEPSCs were analyzed using events detection tool in Axograph. The recorded signals were  
389 bandpass filter (0.1 Hz to 1 kHz) and recordings analyzed with a representative 30 ms EPSC  
390 template, after which selected EPSCs aligned and averaged for further analysis of inter-event  
391 intervals (frequency) and peak amplitude.

392

### 393 ***uIPSC recording and analysis***

394 PV<sup>+</sup> interneurons (identified in *PV-Cre;Ail4* mice) were targeted for whole-cell current-clamp  
395 recording within a radius of 50 μm from the edge of the L5 soma recorded in voltage-clamp  
396 configuration. APs in PV<sup>+</sup> interneurons were evoked with a brief current injection (1–3 ms  
397 duration) and uIPSCs recorded in the L5 PN from a holding potential of –74 mV. Only responses  
398 with 2 × S.D. of baseline noise were considered being connected. Both fast and slow capacitances  
399 were fully compensated, series-resistance compensation was applied to ~80-90% and the current  
400 and voltage traces acquired at 50 kHz. For stable recordings with > 50 uIPSCs the episodes were  
401 temporally aligned to the AP and the uIPSCs were fit with a multiexponential function in Igor Pro.  
402 The curve fitting detected the baseline, uIPSC onset, rise time, peak amplitude and decay time and  
403 was manually monitored. Fits were either accepted or rejected (e.g. when artefacts were present)  
404 and the number uIPSC failures were noted for each recording.

405

### 406 ***In vitro optogenetics***

407 50 nL of AAV1 particles (titer  $1 \times 10^{12}$  cfu mL<sup>-1</sup>) produced from pAAV-EF1a-double-floxed-  
408 hChR2(H134)-EYFP-WPRE-HGHpA (Addgene.org #20298) was injected into L5 of S1 (co-  
409 ordinates from bregma; AP-0.15 mm ML-0.30 mm and DL-0.75 mm) of 6–9 weeks old *PV-Cre*;  
410 *Ail4* mice. About 7 days after the injection, a subset of mice was placed on 0.2% cuprizone diet  
411 for 8 to 9 weeks. PV<sup>+</sup> interneurons expressing hChR2 were identified using td-tom and YFP co-  
412 expression. Whole-cell voltage-clamp recordings were made from L5 PNs and optically induced  
413 inhibitory postsynaptic currents (oIPSCs) were evoked with a X-cite 120Q, fluorescent lamp using  
414 filter BA460-510 (Olympus) in the presence of CNQX (50 μM) and dAP5 (20 μM) in the bath  
415 solution. The oIPSCs were evoked by illumination of large field with 5 light pulses of each 1 ms



416 and 100 ms apart. Peak amplitude and area under curve (charge) of oIPSC was quantified using  
417 Axograph. Only the first pulse was used for the quantification.

418

### 419 *In-vivo electrophysiology and automated event detection*

420 Chronic ECoG and LFP recordings were performed using in-house made electrodes of platinum-  
421 iridium wire (101R-5T, 90% Pt, 10% Ir, complete diameter of 200  $\mu\text{m}$  with 127  $\mu\text{m}$  metal  
422 diameter, Science Products). The perfluoroalkoxy alkanes (PFA) coated wire platinum-iridium  
423 wire was only exposed at the tip to record the local field potential (LFP). For placement of the  
424 recording electrode, animals were anesthetized with isoflurane (3%, flow rate 0.8 L/min with  
425 maintenance 1.5–1.8%, flow rate 0.6 L/min). A 1 cm midline sagittal incision was made starting  
426 above the interaural line and extending along the neck to create a pocket for subcutaneous  
427 placement of the transmitter along the dorsal flank of the animal. The recording electrodes in each  
428 hemi-sphere (stereotaxic coordinates relative to bregma: S1;  $-0.15$  mm anterior and  $\pm 0.30$  mm  
429 lateral; for LFP; ventral 0.75 mm, V1; 0.40 mm anterior and  $\pm 0.30$  mm lateral; for LFP; ventral  
430 0.75 mm) and ground electrode (6 mm posterior and 1 mm lateral) were implanted sub-durally  
431 through small holes drilled in the skull, held in place with stainless steel screws (A2-70, Jevcka)  
432 and subsequently sealed with dental cement. Mice were provided with Metachem analgesic (0.1  
433 mg per kg) after surgery and allowed to recover for 4–7 days before recordings. To obtain multiple  
434 hours recordings of ECoG-LFP at multiple weeks, mice remained in their home cage during an  
435 overnight recording session. ECoG–LFP data were collected using a ME2100-system (Multi  
436 channel Systems); ECoG-LFP data were acquired at a sampling rate of 2 kHz using the multi-  
437 channel experimenter software (Multi channel systems). An additional 0.1–200 Hz digital band-  
438 pass filter was applied before data analysis. Large noise signals, due to excessive locomotion or  
439 grooming, were manually removed from the data. The ECoG and LFP recordings were processed  
440 offline with the Neuroarchiver tool (Open Source Instruments,  
441 [http://www.opensourceinstruments.com/Electronics/A3018/Seizure\\_Detection.html](http://www.opensourceinstruments.com/Electronics/A3018/Seizure_Detection.html)). To detect  
442 interictal spikes an event detection library was built as described previously<sup>31</sup>. During the initial  
443 learning phase of the library the observer, if needed, overruled the identity of each new event by  
444 the algorithm, until automated detection reached a false positive rate  $< 1\%$ . Subsequently, the  
445 ECoG-LFP data were detected by using a single library across all ECoG-LFP recordings. For  
446 determining the interictal rate, only S1 LFP signals were used for quantification.

447

448 ***In-vivo optogenetics with simultaneous ECoG-LFP recordings***

449 50 nl of AAV1 particles (titer  $1 \times 10^{12}$  cfu ml<sup>-1</sup>) produced from pAAV-EF1a-double-floxed-  
450 hChR2(H134)-EYFP-WPRE-HGHpA (Addgene #20298) was injected unilaterally into the L5 of  
451 S1 (coordinates from bregma; AP-0.15 mm ML-0.30 mm and DL-0.75 mm) of 6–9 weeks old *PV-  
452 Cre; Ai14* mice. ECoG-LFP electrode (stereotaxic coordinates relative to bregma: -0.15 mm  
453 anterior and  $\pm$  0.30 mm lateral; for LFP; ventral 0.75 mm) and ground electrode (6 mm posterior  
454 and 1 mm lateral) were implanted through small holes drilled in the skull, held in place with  
455 stainless steel screws (A2-70, Jevcka). Through the drilled hole, a polished multimode optical fiber  
456 (FP200URT, Thorlabs) held in ceramic ferrule (CFLC230-10, Thorlabs) was driven into the layer  
457 5 and ~50  $\mu$ m above virus injection site. Once optical fiber and electrode were correctly placed,  
458 the drilled hole subsequently sealed with dental cement. A blue fiber-coupled laser (473 nm, DPSS  
459 Laser T3, Shanghai Laser & Optics Co.) was used to activate the ChR2. Cyclops LED Driver  
460 (Open ephys) together with customized program was used to design the on and off state of the  
461 laser. The driving signal from LED driver was also recorded at one of the empty channels in multi-  
462 channel systems. This signal was used to estimate the blue light on or off condition. For gamma  
463 entrainment in S1, 40 pulses of blue light were flashed with 1 ms on and 28 ms off pulse.

464  
465 To inhibit interictal spikes, 300 pulses of blue light were flashed with 1 sec on and 100 ms off by  
466 manual activation of light pulses when periods of high interictal spikes were observed (> 40  
467 interictals/min). Aged-matched control mice were stimulated during the resting phase of the EEG,  
468 which was estimated using online EMG signal and video observation. For interictal counts, 5 min  
469 LFP signals were used from before light stimulation, during, and post light stimulation. Interictal  
470 were detected using event detection library. For analysis of the cortical rhythms, epochs were  
471 extracted using 2 second window at the start and after 180 pulses of blue light. Epoch containing  
472 interictal were not included in the analysis.

473  
474 For pharmacology experiment, continuous LFP recordings of > 10-12 hours duration from the  
475 circadian quiet phase (from 19:00 to 09:00) of 6 cuprizone mice (7 weeks treatment) and 3 control  
476 mice were used for the analysis. To activate GABA<sub>A</sub> receptors in cuprizone-treated mice, we used  
477 diazepam (Centrafarm Nederland B.V) prepared in a 10% solution of (2-Hydroxypropyl)- $\beta$ -cyclo-  
478 dextrin (Sigma-Aldrich). A non-sedative dose of 2 mg kg<sup>-1</sup> diazepam was injected  
479 intraperitoneally, and data was acquired for a period of 10 hours, starting 15 min after injection of

480 drug in control and cuprizone mice. The automated event detection library (**Fig. S1**) was used to  
481 determine the event frequency before and after diazepam injection.

482

### 483 *In-vivo power spectrum analysis*

484 Power spectral density (PSD) analysis was done using multi-taper PSD toolbox from Igor Pro 8.0.  
485 The absence of high voltage activity in the EMG electrode was classified as quiet wakefulness  
486 (**Fig. S1** and **Movie S1**). For PSD analysis during interictal activity, a 2 sec window was used to  
487 extract LFP signal epochs. Epochs from control animals were selected comparing the EMG  
488 activity with cuprizone EMG activity. The interictal activity itself was excluded from the analysis.  
489 Selected LFP epochs were band pass filtered between different frequency bands; delta,  $\delta$ , (0.5-3  
490 Hz), theta,  $\theta$ , (4-12 Hz), beta,  $\beta$ , (12.5-25 Hz) and gamma,  $\gamma$ , (30-80 Hz). Multi-taper PSD function  
491 (Igor Pro 8.0) was applied to the filtered the data to plot the power distribution within each  
492 frequency band. Areas under the curve was measured for each frequency band to compare power  
493 density between the control and cuprizone groups.

494

### 495 *Immunohistochemistry*

496 L5 PNs were filled with 10 mg ml<sup>-1</sup> biocytin during whole-cell patch clamp recording for at least  
497 30 minutes. Slices were fixed for 30 min with 4% paraformaldehyde (PFA) and stored in 0.1 M  
498 phosphate buffered saline (PBS; pH 7.4) at 4 °C. Fixed 400  $\mu$ m slices were embedded in 20%  
499 gelatin (Sigma-Aldrich) and then sectioned with a Vibratome (VT1000 S, Leica Microsystems) at  
500 80  $\mu$ m. Sections were pre-incubated with blocking 0.1M PBS containing 5% normal goat serum  
501 (NGS), 5% bovine-serum albumin (BSA; Sigma-Aldrich) and 0.3% Triton-X (Sigma) during 2  
502 hours at 4 °C to make the membrane permeable. For biocytin-labelled cells, streptavidin biotin-  
503 binding protein (Streptavidin Alexa 488, 1:500, Invitrogen) was diluted in 5% BSA with 5% NGS  
504 and 0.3% Triton-X overnight at 4 °C. Sections including biocytin-filled cells were incubated again  
505 overnight at 4 °C with primary antibody rabbit anti- $\beta$ IV-spectrin (1:200; gift from M.N. Rasband,  
506 Baylor College of Medicine), mouse anti-myelin basic protein (MBP) (1:250; Covance), mouse  
507 anti-PV (1:1000; Swant) rabbit anti-syt2 (1:500, Synaptic Systems) in PBS blocking solution  
508 containing 5% BSA with 5% NGS and 0.3% Triton-X. Secondary antibody were used to visualize  
509 the immunoreactions: Alexa 488-conjugated goat anti-rabbit (1:500; Invitrogen), Alexa 488 goat  
510 anti-mouse (1: 500; Sanbio), Alexa 488 goat anti- guinea pig, Alexa 555 goat anti-mouse (1:500;  
511 Invitrogen), Alexa 555 goat anti-rabbit (1:500; Invitrogen), Alexa 633 goat anti-guinea pig (1:500;

512 Invitrogen), Alexa 633 goat anti-mouse (1:500; Invitrogen) and Alexa 633 goat anti-rabbit (1:500;  
513 Invitrogen). Finally, sections were mounted on glass slides and cover slipped with Vectashield  
514 H1000 fluorescent mounting medium (Vector Laboratories, Peterborough, UK) and sealed.

515

### 516 ***Confocal imaging***

517 A confocal laser-scanning microscope SP8 X (DM6000 CFS; acquisition software, Leica  
518 Application Suite AF v3.2.1.9702) with a 63× oil-immersion objective (1.3 NA) and with 1×  
519 digital zoom was used to collect images of the labelled L5 neurons and the above-mentioned  
520 proteins. Alexa fluorescence was imaged using corresponding excitation wavelengths at 15 units  
521 of intensity and a  $z$ -step of 0.3  $\mu\text{m}$ . Image analysis was performed with Fiji (ImageJ) graphic  
522 software (v.2.0.0-rc-65/1.5w, National Institutes of Health). Putative PV<sup>+</sup> puncta counting or Syt2  
523 was manually done by trained personal blinded to the identity of the experimental groups.

524

### 525 ***Synaptic puncta counting and image analysis***

526 The intensity of PV<sup>+</sup> or Syt2 immunostaining was measured with a  $z$ -axis profile, calculating the  
527 mean RGB value for each  $z$ -plane. In quantifying the axosomatic projections, the soma is defined  
528 by cutting off the apical dendrite at  $\sim 4$   $\mu\text{m}$  from an imaginary rounding of the soma. The boutons  
529 were selected by hand indicated either by colocalization of the pyramidal cell and PV/Syt2 or  
530 direct contact of the two. The boutons were characterized as round spots with a minimal radius of  
531 0.5  $\mu\text{m}$  ranging to almost 2  $\mu\text{m}$ . All image analysis was done in FIJI (ImageJ) graphic software  
532 (v2.0, National Institutes of Health).

533

534

### 535 ***PV<sup>+</sup> axon reconstruction and quantification***

536 For immunolabeling of biocytin-filled PV<sup>+</sup> interneuron, 400  $\mu\text{m}$  electrophysiology slices were  
537 incubated overnight at 4 °C in PFA. Slices were rinsed with PBS followed by staining using  
538 streptavidin 488 (1:300, Jackson) diluted in PBS containing 0.4% Triton-X and 2% normal horse  
539 serum (NHS; Gibco) overnight at 4 °C. Confocal images of 400  $\mu\text{m}$  thick slices were taken (see  
540 Methods, Confocal Imaging) and immediately after, thoroughly rinsed with 0.1M PB and 30%  
541 sucrose at 4 °C overnight. Next, slices were sectioned into 40- $\mu\text{m}$  thick and preserved in 0.1 M PB  
542 before staining. Sections were pre-incubated in PBS blocking buffer containing 0.5% Triton-X  
543 and 10% NHS during one hour at room temperature. Sections were stained with primary mouse

544 anti-MBP (1:300, Santa Cruz), rabbit anti-syt2 in 0.4% Triton-X and 2% NHS with PBS solution  
545 for 72 h. Alexa 488-conjugated secondary antibodies (1:300, Invitrogen) were added in PBS  
546 containing 0.4% Triton-X and 2% NHS, posterior to washing steps with PBS. Then, sections were  
547 mounted on slides and cover slipped with Vectashield H1000 fluorescent mounting medium,  
548 sealed and imaged. Biocytin-labelled PV<sup>+</sup> neurons were imaged using upright Zeiss LSM 700  
549 microscope (Carl Zeiss) with 10× and 63× oil-immersion objectives (0.45 NA and 1.4 NA,  
550 respectively) and 1× digital zoom with step size of 0.5 μm. Alexa 488 and Alexa 647 were imaged  
551 using 488 and 639 excitation wavelengths, respectively. The 10× image was taken to determine  
552 the exact location of biocytin-filled cells. Subsequently, axonal images were taken at 63×  
553 magnification. Axons were analyzed as described previously<sup>45</sup> and identified by their thin  
554 diameter, smoothness, obtuse branching processes and occasionally by the presence of the axon  
555 bleb. Images were opened in NeuroLucida 360 software (v2018.02, MBF Bioscience) for  
556 reconstruction using the interactive user-guided trace with the Directional Kernels method. Axon  
557 and myelinated segments were analyzed using NeuroLucida Explorer (MBF Bioscience). Axonal  
558 segments were accepted as myelinated when at least one MBP-positive segment co-localized with  
559 streptavidin across the internode length.

560

### 561 *Statistics*

562 For comparisons of two independent groups, we used two-tailed Mann-Whitney U tests. For  
563 multiple groups comparisons, data were assessed for normality and either an ordinary two-way  
564 analysis of variance (ANOVA) or two-way ANOVA with repeated measures followed by Šidák's  
565 multiple comparisons test was applied using Prism 8 (Version 8.3.0, GraphPad Software). The  
566 level of significance was set to 0.05 for rejecting the null hypothesis. An overview of the results  
567 from all statistical analyses is presented in **Table S2**.

568

### 569 **Data availability**

570 All raw data will be made available upon request to the corresponding author.

571

572

573 **References**

574

- 575 1. Tremblay, R., Lee, S. & Rudy, B. GABAergic Interneurons in the Neocortex: From Cellular  
576 Properties to Circuits. *Neuron* 91, 260–292 (2016).
- 577 2. Hu, H., Gan, J. & Jonas, P. Interneurons. Fast-spiking, parvalbumin<sup>+</sup> GABAergic interneurons:  
578 from cellular design to microcircuit function. *Science* 345, 1255263 (2014).
- 579 3. Bartos, M. *et al.* Fast synaptic inhibition promotes synchronized gamma oscillations in  
580 hippocampal interneuron networks. *Proceedings of the National Academy of Sciences of the*  
581 *United States of America* 99, 13222–13227 (2002).
- 582 4. Gonchar, Y. & Burkhalter, A. Three distinct families of GABAergic neurons in rat visual  
583 cortex. *Cereb Cortex* 7, 347–358 (1997).
- 584 5. Tamás, G., Buhl, E. H. & Somogyi, P. Fast IPSPs elicited via multiple synaptic release sites by  
585 different types of GABAergic neurone in the cat visual cortex. *J Physiology* 500, 715–738  
586 (1997).
- 587 6. Atallah, B. V., Bruns, W., Carandini, M. & Scanziani, M. Parvalbumin-Expressing Interneurons  
588 Linearly Transform Cortical Responses to Visual Stimuli. *Neuron* 73, 159–170 (2012).
- 589 7. Lee, S.-H. *et al.* Activation of specific interneurons improves V1 feature selectivity and visual  
590 perception. *Nature* 488, 379–383 (2013).
- 591 8. Cardin, J. A. *et al.* Driving fast-spiking cells induces gamma rhythm and controls sensory  
592 responses. *Nature* 459, 663–667 (2009).
- 593 9. Zucca, S. *et al.* An inhibitory gate for state transition in cortex. *Elife* 6, e26177 (2017).
- 594 10. Yang, J.-W. *et al.* Optogenetic Modulation of a Minor Fraction of Parvalbumin-Positive  
595 Interneurons Specifically Affects Spatiotemporal Dynamics of Spontaneous and Sensory-  
596 Evoked Activity in Mouse Somatosensory Cortex in Vivo. *Cerebral Cortex* 27, 5784–5803  
597 (2017).
- 598 11. Sommeijer, J.-P. & Levelt, C. N. Synaptotagmin-2 is a reliable marker for parvalbumin  
599 positive inhibitory boutons in the mouse visual cortex. *PLoS ONE* 7, e35323 (2012).
- 600 12. Chen, C., Arai, I., Satterfield, R., Young, S. M. & Jonas, P. Synaptotagmin 2 Is the Fast Ca<sup>2+</sup>  
601 Sensor at a Central Inhibitory Synapse. *Cell reports* 18, 723–736 (2017).
- 602 13. Somogyi, P., Kisvárdy, Z. F., Martin, K. A. & Whitteridge, D. Synaptic connections of  
603 morphologically identified and physiologically characterized large basket cells in the striate  
604 cortex of cat. *Neuroscience* 10, 261–294 (1983).

- 605 14. Thomson, A. M., West, D. C., Hahn, J. & Deuchars, J. Single axon IPSPs elicited in pyramidal  
606 cells by three classes of interneurons in slices of rat neocortex. *J Physiology* 496, 81–102  
607 (1996).
- 608 15. Peters, A. & Proskauer, C. C. Smooth or sparsely spined cells with myelinated axons in rat  
609 visual cortex. *Neuroscience* 5, 2079–2092 (1980).
- 610 16. Micheva, K. D. *et al.* A large fraction of neocortical myelin ensheathes axons of local  
611 inhibitory neurons. *eLife* 5, e15784 (2016).
- 612 17. Stedehouder, J. *et al.* Fast-spiking Parvalbumin Interneurons are Frequently Myelinated in the  
613 Cerebral Cortex of Mice and Humans. *Cerebral Cortex* 27, 5001–5013 (2017).
- 614 18. Yang, S. M., Michel, K., Jokhi, V., Nedivi, E. & Arlotta, P. Neuron class-specific responses  
615 govern adaptive myelin remodeling in the neocortex. *Sci New York N Y* 370, (2020).
- 616 19. Nave, K.-A. & Werner, H. B. Myelination of the nervous system: mechanisms and functions.  
617 *Annual review of cell and developmental biology* 30, 503–533 (2014).
- 618 20. Cohen, C. C. H. *et al.* Saltatory Conduction along Myelinated Axons Involves a Periaxonal  
619 Nanocircuit. *Cell* 180, 311–322.e15 (2020).
- 620 21. Schmidt, H. *et al.* Axonal synapse sorting in medial entorhinal cortex. *Nature* 549, 469–475  
621 (2017).
- 622 22. Micheva, K. D., Kiraly, M., Perez, M. M. & Madison, D. V. Conduction Velocity Along the  
623 Local Axons of Parvalbumin Interneurons Correlates With the Degree of Axonal Myelination.  
624 *Cereb Cortex* 31, bhab018- (2021).
- 625 23. Barron, T., Saifetiarova, J., Bhat, M. A. & Kim, J. H. Myelination of Purkinje axons is critical  
626 for resilient synaptic transmission in the deep cerebellar nucleus. *Scientific reports* 8, 1022  
627 (2018).
- 628 24. Benamer, N., Vidal, M., Balia, M. & Angulo, M. C. Myelination of parvalbumin interneurons  
629 shapes the function of cortical sensory inhibitory circuits. *Nature Communications* 11, 5151  
630 (2020).
- 631 25. Veit, J., Hakim, R., Jadi, M. P., Sejnowski, T. J. & Adesnik, H. Cortical gamma band  
632 synchronization through somatostatin interneurons. *Nat Neurosci* 20, 951–959 (2017).
- 633 26. Sohal, V. S., Zhang, F., Yizhar, O. & Deisseroth, K. Parvalbumin neurons and gamma rhythms  
634 enhance cortical circuit performance. *Nature* 459, 698–702 (2009).
- 635 27. Buzsáki, G. *Rhythms of the Brain*. (Oxford University Press, 2006).  
636 doi:10.1093/acprof:oso/9780195301069.001.0001.
- 637 28. Kipp, M., Clarner, T., Dang, J., Copray, S. & Beyer, C. The cuprizone animal model: new  
638 insights into an old story. *Acta Neuropathologica* 118, 723–736 (2009).
- 639 29. Hamada, M. S. & Kole, M. H. P. Myelin loss and axonal ion channel adaptations associated  
640 with gray matter neuronal hyperexcitability. *The Journal of neuroscience* 35, 7272–7286  
641 (2015).
- 642 30. Clarner, T. *et al.* Myelin debris regulates inflammatory responses in an experimental  
643 demyelination animal model and multiple sclerosis lesions. *Glia* 60, 1468–1480 (2012).

- 644 31. Dubey, M. *et al.* Seizures and disturbed brain potassium dynamics in the leukodystrophy  
645 megalencephalic leukoencephalopathy with subcortical cysts. *Annals of Neurology* 83, 636–649  
646 (2018).
- 647 32. Cohen, I., Navarro, V., Clémenceau, S., Baulac, M. & Miles, R. On the origin of interictal  
648 activity in human temporal lobe epilepsy in vitro. *Science* 298, 1418–1421 (2002).
- 649 33. Tóth, K. *et al.* Hyperexcitability of the network contributes to synchronization processes in the  
650 human epileptic neocortex. *J Physiology* 596, 317–342 (2017).
- 651 34. Hoffmann, K., Lindner, M., Gröticke, I., Stangel, M. & Löscher, W. Epileptic seizures and  
652 hippocampal damage after cuprizone-induced demyelination in C57BL/6 mice. *Experimental*  
653 *neurology* 210, 308–321 (2008).
- 654 35. Readhead, C. *et al.* Expression of a myelin basic protein gene in transgenic shiverer mice:  
655 Correction of the dysmyelinating phenotype. *Cell* 48, 703–712 (1987).
- 656 36. Chernoff, G. F. Shiverer: an autosomal recessive mutant mouse with myelin deficiency. *The*  
657 *Journal of heredity* 72, 128 (1981).
- 658 37. Brill, J., Mattis, J., Deisseroth, K. & Huguenard, J. R. LSPS/Optogenetics to Improve Synaptic  
659 Connectivity Mapping: Unmasking the Role of Basket Cell-Mediated Feedforward Inhibition.  
660 *eNeuro* 3, (2016).
- 661 38. Xu, J., Mashimo, T. & Südhof, T. C. Synaptotagmin-1, -2, and -9: Ca(2+) sensors for fast  
662 release that specify distinct presynaptic properties in subsets of neurons. *54*, 567–581 (2007).
- 663 39. Packer, A. M. & Yuste, R. Dense, unspecific connectivity of neocortical parvalbumin-positive  
664 interneurons: a canonical microcircuit for inhibition? *The Journal of neuroscience* 31, 13260–  
665 13271 (2011).
- 666 40. Turecek, J., Jackman, S. L. & Regehr, W. G. Synaptic Specializations Support Frequency-  
667 Independent Purkinje Cell Output from the Cerebellar Cortex. *Cell Reports* 17, 3256–3268  
668 (2016).
- 669 41. Zhou, J., Lenck-Santini, P., Zhao, Q. & Holmes, G. L. Effect of Interictal Spikes on Single-  
670 Cell Firing Patterns in the Hippocampus. *Epilepsia* 48, 720–731 (2007).
- 671 42. Kleen, J. K., Scott, R. C., Holmes, G. L. & Lenck-Santini, P. P. Hippocampal interictal spikes  
672 disrupt cognition in rats. *Ann Neurol* 67, 250–257 (2010).
- 673 43. Poulet, J. F. A. & Petersen, C. C. H. Internal brain state regulates membrane potential  
674 synchrony in barrel cortex of behaving mice. *Nature* 454, 881–885 (2008).
- 675 44. Gentet, L. J., Avermann, M., Matyas, F., Staiger, J. F. & Petersen, C. C. H. Membrane  
676 Potential Dynamics of GABAergic Neurons in the Barrel Cortex of Behaving Mice. *Neuron* 65,  
677 422–435 (2010).
- 678 45. Stedehouder, J. *et al.* Local axonal morphology guides the topography of interneuron  
679 myelination in mouse and human neocortex. *eLife* 8, (2019).
- 680 46. Stedehouder, J. & Kushner, S. A. Myelination of parvalbumin interneurons: a parsimonious  
681 locus of pathophysiological convergence in schizophrenia. *Molecular psychiatry* 22, 4–12  
682 (2017).



- 683 47. Miles, R. Variation in strength of inhibitory synapses in the CA3 region of guinea-pig  
684 hippocampus in vitro. *J Physiology* 431, 659–676 (1990).
- 685 48. Rossignol, E., Kruglikov, I., Maagdenberg, A. M. J. M. van den, Rudy, B. & Fishell, G. CaV  
686 2.1 ablation in cortical interneurons selectively impairs fast-spiking basket cells and causes  
687 generalized seizures. *Annals of Neurology* 74, 209–222 (2013).
- 688 49. Casale, A. E., Foust, A. J., Bal, T. & McCormick, D. A. Cortical Interneuron Subtypes Vary in  
689 Their Axonal Action Potential Properties. *J Neurosci* 35, 15555–15567 (2015).
- 690 50. Hu, H. & Jonas, P. A supercritical density of Na(+) channels ensures fast signaling in  
691 GABAergic interneuron axons. *Nature Neuroscience* (2014) doi:10.1038/nn.3678.
- 692 51. Lubetzki, C., Sol-Foulon, N. & Desmazieres, A. Nodes of Ranvier during development and  
693 repair in the CNS. *Nature Reviews Neurology* 16, 426–439 (2020).
- 694 52. Freeman, S. A. *et al.* Acceleration of conduction velocity linked to clustering of nodal  
695 components precedes myelination. *Proceedings of the National Academy of Sciences* 112,  
696 E321-8 (2015).
- 697 53. Micheva, K. D. *et al.* Distinctive Structural and Molecular Features of Myelinated Inhibitory  
698 Axons in Human Neocortex. *eNeuro* 5, (2018).
- 699 54. Edgar, J. M. *et al.* Early ultrastructural defects of axons and axon-glia junctions in mice  
700 lacking expression of Cnp1. *Glia* 57, 1815–1824 (2009).
- 701 55. Fünfschilling, U. *et al.* Glycolytic oligodendrocytes maintain myelin and long-term axonal  
702 integrity. *Nature* 485, 517–521 (2012).
- 703 56. Berg, R. van den, Hoogenraad, C. C. & Hintzen, R. Q. Axonal transport deficits in multiple  
704 sclerosis: spiraling into the abyss. *Acta Neuropathologica* 134, 1–14 (2017).
- 705 57. Lindner, M., Fokuhl, J., Linsmeier, F., Trebst, C. & Stangel, M. Chronic toxic demyelination  
706 in the central nervous system leads to axonal damage despite remyelination. *Neuroscience*  
707 *letters* 453, 120–125 (2009).
- 708 58. Sorbara, C. D. *et al.* Pervasive Axonal Transport Deficits in Multiple Sclerosis Models.  
709 *Neuron* 84, 1183–1190 (2014).
- 710 59. Chen, Z. *et al.* Microglial displacement of inhibitory synapses provides neuroprotection in the  
711 adult brain. *Nature communications* 5, 4486 (2014).
- 712 60. Ramaglia, V. *et al.* Complement-associated loss of CA2 inhibitory synapses in the  
713 demyelinated hippocampus impairs memory. *Acta Neuropathol* 1–25 (2021)  
714 doi:10.1007/s00401-021-02338-8.
- 715 61. Favuzzi, E. *et al.* GABA-receptive microglia selectively sculpt developing inhibitory circuits.  
716 *Cell* 184, 4048-4063.e32 (2021).
- 717 62. Caprariello, A. V. *et al.* Biochemically altered myelin triggers autoimmune demyelination.  
718 *Proc National Acad Sci* 115, 201721115 (2018).
- 719 63. Skripuletz, T. *et al.* Astrocytes regulate myelin clearance through recruitment of microglia  
720 during cuprizone-induced demyelination. *Brain* 136, 147–167 (2013).

- 721 64. Poggi, G. *et al.* Cortical network dysfunction caused by a subtle defect of myelination. *Glia*  
722 64, 2025–2040 (2016).
- 723 65. Benedict, R. H. B., Amato, M. P., DeLuca, J. & Geurts, J. J. G. Cognitive impairment in  
724 multiple sclerosis: clinical management, MRI, and therapeutic avenues. *Lancet Neurology* 19,  
725 860–871 (2020).
- 726 66. Kleen, J. K. *et al.* Hippocampal interictal epileptiform activity disrupts cognition in humans.  
727 *Neurology* 81, 18–24 (2013).
- 728 67. Henin, S. *et al.* Spatiotemporal dynamics between interictal epileptiform discharges and  
729 ripples during associative memory processing. *Brain* (2021) doi:10.1093/brain/awab044.
- 730 68. Lam, A. D. *et al.* Silent hippocampal seizures and spikes identified by foramen ovale  
731 electrodes in Alzheimer’s disease. *Nat Med* 23, 678–680 (2017).
- 732 69. Chen, J.-F. *et al.* Enhancing myelin renewal reverses cognitive dysfunction in a murine model  
733 of Alzheimer’s disease. *Neuron* 109, 2292–2307.e5 (2021).
- 734 70. Drenthen, G. S. *et al.* On the merits of non-invasive myelin imaging in epilepsy, a literature  
735 review. *J Neurosci Meth* 338, 108687 (2020).
- 736 71. Zoupi, L. *et al.* Selective vulnerability of inhibitory networks in multiple sclerosis. *Acta*  
737 *Neuropathol* 141, 415–429 (2021).
- 738 72. Tewarie, P. *et al.* Disruption of structural and functional networks in long-standing multiple  
739 sclerosis. *Human brain mapping* 35, 5946–5961 (2014).
- 740 73. Schoonheim, M. M. *et al.* Functional connectivity changes in multiple sclerosis patients: a  
741 graph analytical study of MEG resting state data. *Human brain mapping* 34, 52–61 (2013).
- 742 74. Cawley, N. *et al.* Reduced gamma-aminobutyric acid concentration is associated with physical  
743 disability in progressive multiple sclerosis. *Brain* 138, 2584–2595 (2015).
- 744 75. Gao, F. *et al.* Altered hippocampal GABA and glutamate levels and uncoupling from  
745 functional connectivity in multiple sclerosis. *Hippocampus* 28, 813–823 (2018).

746

747

748 **Acknowledgements.** The authors are indebted to Prof. Dr. Stefan Hallermann (University of  
749 Leipzig) for providing the uIPSC analysis script. We thank Ms. Anouk Meuwissen, Catherine  
750 Jenkins, Denise de Ronde and Dr. Koen Kole (NIN–KNAW) with their support in part of the  
751 recordings and optogenetic experiments. Sharon I. De Vries performed the electron microscopy.  
752 Dr. Corette Wierenga (UU) and Dr. David Vandael provided highly valuable comments on earlier  
753 versions of the manuscript and experimental work. This work was in part funded by The National  
754 Multiple Sclerosis Society RG-1602-07777 (M.K.), The Netherlands Research Council NWO Vici  
755 865.17.003 (M.K.), The Netherlands Research Council NWO 013.18.002 (S.A.K.), European  
756 Research Area Network ERA-NET NEURON JTC2018-024 (S.A.K.)

757

758 **Author contributions.** Conceptualization: M.K., Visualization: M.K., M.D., Experimental  
759 design: M.K., M.D., Supervision: M.D., S.K., M.K., Funding acquisition: M.K., S.K.,  
760 Methodology: M.D., M.K., S.K., Software: M.D., Investigation: M.D., M.G., K.H., D.W., M.H.,  
761 M.K., Formal analysis, M.D., M.G., M.K., Writing – original draft, M.K., Writing – reviewing &  
762 editing final draft, M.D., M.K., S.K., Data curation, M.D., M.K.

763

764 **Competing interests.** The authors declare they do not have competing interests.

765

766 **Materials & correspondence:** Requests should be directed to Prof. Dr. Maarten H.P. Kole,  
767 [m.kole@nin.knaw.nl](mailto:m.kole@nin.knaw.nl)

768

769

770

## Figures

771

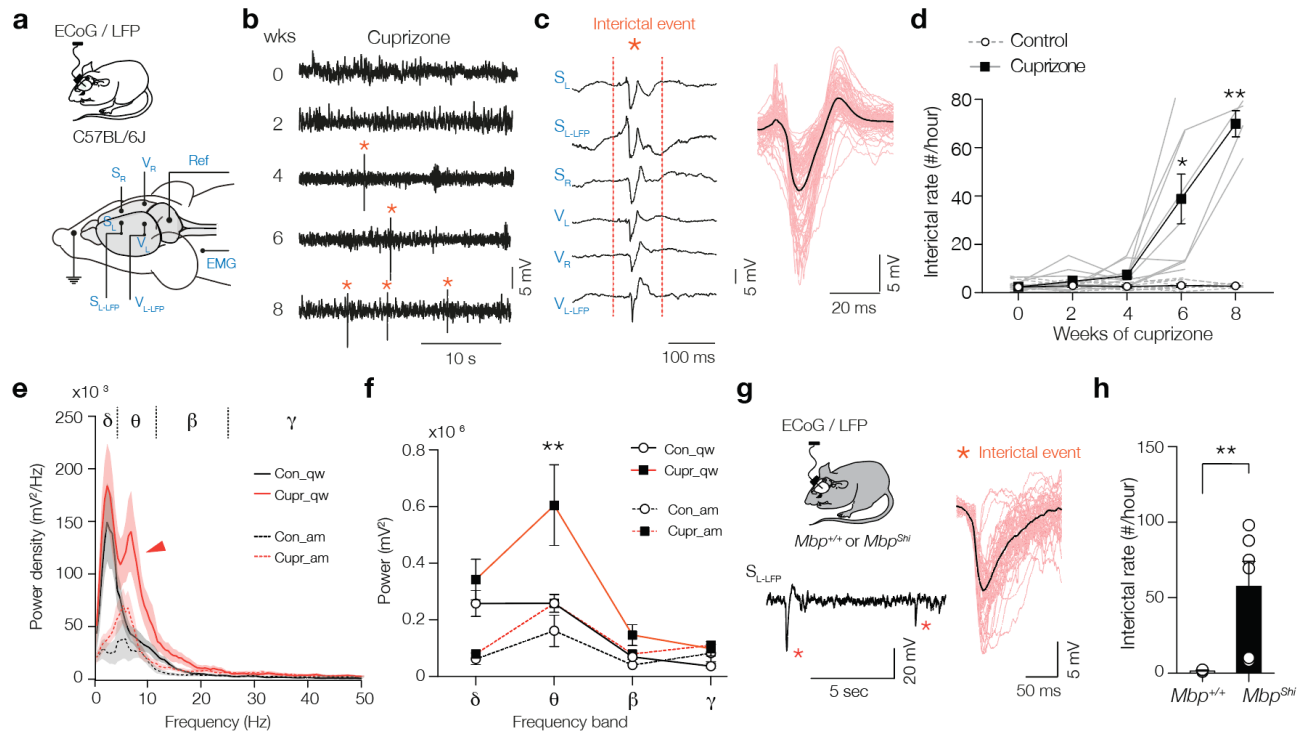

772

773

774

775

776

777

778

779

780

781

782

783

784

785

786

787

788

789

790

791

792

### Fig. 1. Loss of compact myelin causes interictal spikes and behavioral state-dependent amplification of theta rhythms

(A) Schematic of the ECoG and LFP recordings in freely-moving mice. Electrodes were placed right ( $S_R$ ) and left ( $S_L$ ) in the primary somatosensory cortex, and a left LFP electrode ( $S_{L-LFP}$ ) into L5. A similar array of electrodes was positioned in the primary visual cortex ( $V_R$ ,  $V_L$  and  $V_{L-LFP}$ ). One electrode was placed around neck muscle recording electromyography (EMG) and one used as reference (Ref). (B) Interictal spikes (\*) appear from 4 weeks cuprizone and onwards. Example raw LFP traces ( $S_{L-LFP}$ ). (C) Representative interictal spike example showing spatiotemporal synchronization of the spike across cortical areas and hemispheres. Higher magnification of interictal spikes (red, ~50 to 300 ms duration) overlaid with the average (black). (D) Population data of interictal spikes frequency versus cuprizone treatment duration. (E) Power spectral content during two different brain states, awake and moving (am, dotted lines) and quiet wakefulness (qw, solid lines) in control (black) and cuprizone (red). Red arrow marks the significantly amplified theta band power ( $\theta$ ) during quiet wakefulness in cuprizone mice (Cupr\_qw). (F) Cuprizone amplifies  $\theta$  power during quiet wakefulness but not during moving. (G) Schematic of ECoG and LFP recordings from  $Mbp^{+/+}$  and  $Mbp^{Shi}$  mice with example trace showing interictal spikes. Higher temporal resolution of interictals in  $Mbp^{Shi}$  mice. (H) Bar plot of interictal rate in  $Mbp^{Shi}$  mice. Data show mean  $\pm$  SEM with gray lines (D) or open circles (H) showing individual mice.

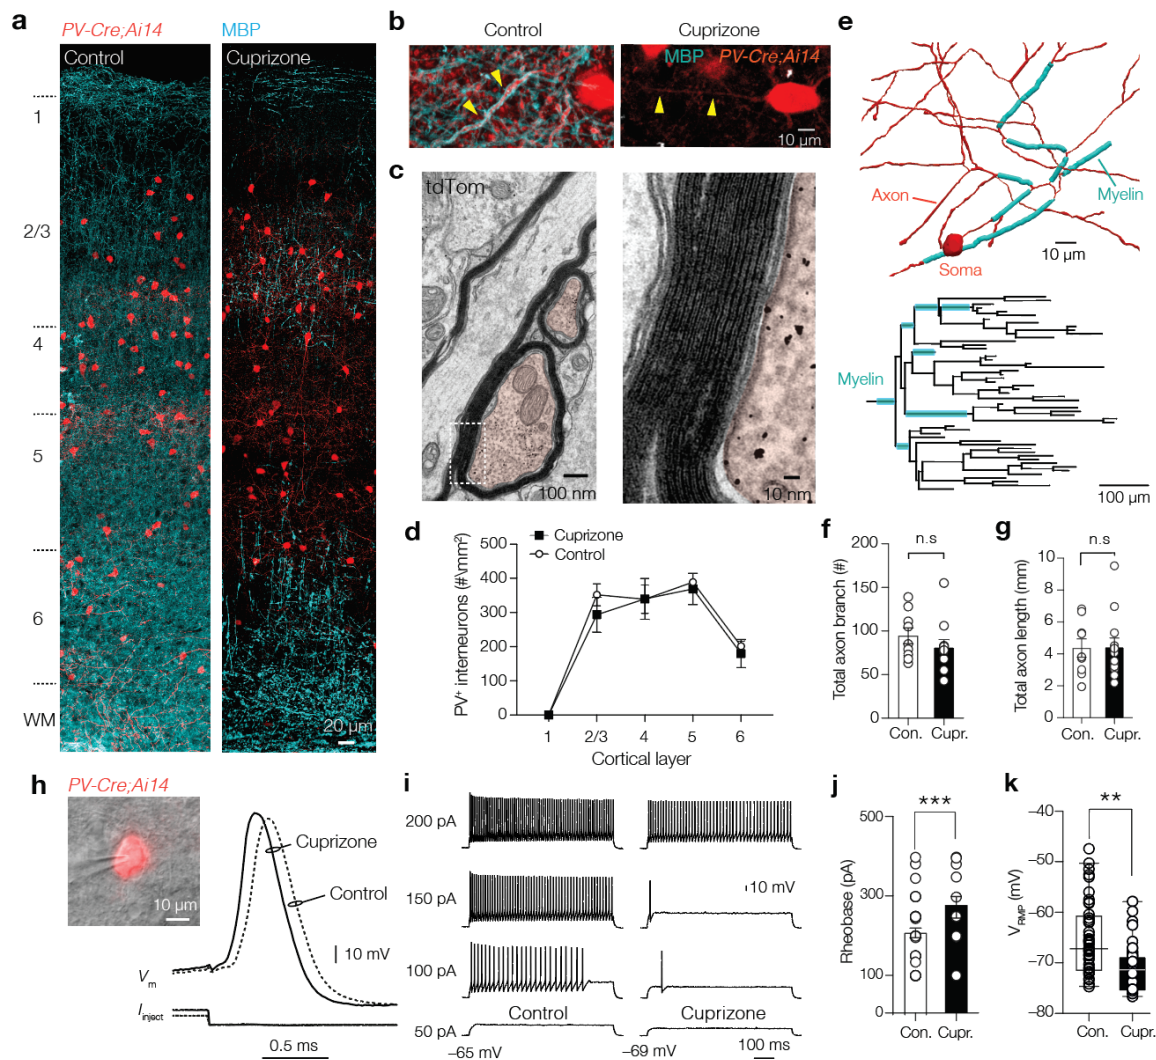

**Fig. 2. Demyelination preserves PV<sup>+</sup> interneuron number and morphology but reduces excitability.** (a) *Left*, confocal z-projected overview image of S1 in *PV-Cre; Ai14* animal (tdTomato<sup>+</sup>, red) overlaid with myelin basic protein (MBP, cyan). *Right*, overview image showing loss of MBP after 6 weeks cuprizone. (b) myelinated PV<sup>+</sup> axons in control (*left*) and PV<sup>+</sup> axons demyelination with cuprizone treatment (*Right*). (c) EM of transverse cut tdTomato<sup>+</sup> immunogold-labelled axons (false colored red). *Right*, higher magnification of immunogold particles and ultrastructure of the PV interneuron myelin sheath. (d) PV<sup>+</sup> interneuron number was not affected by cuprizone treatment. (e) *Top*, example of a high-resolution 3D reconstruction of a biocytin-labelled PV axon (red) labelled with MBP (cyan) of a control mouse, showing the first ~6 axonal branch orders. *Bottom*, control axonogram showing axon branch order and myelinated segments (cyan). (f-g) Total axon branch number and length are not changed by demyelination. (h) *Left*, brightfield/fluorescence overlay showing patch-clamp recording from a tdTomato<sup>+</sup> interneuron. *Right*, example PV<sup>+</sup> interneuron APs from control (dotted line) and cuprizone treated mice (continuous lines). (i) Steady-state sub- and supra-threshold voltage responses during 700 ms current injections. Note the reduced firing rate near threshold. and (j) increased rheobase current in cuprizone. (k) ~4 mV hyperpolarized resting membrane potential in demyelinated PV BCs. Data show mean ± SEM and open circles individual cells. n.s., not significant

793

794

795

796

797

798

799

800

801

802

803

804

805

806

807

808

809

810

811

812

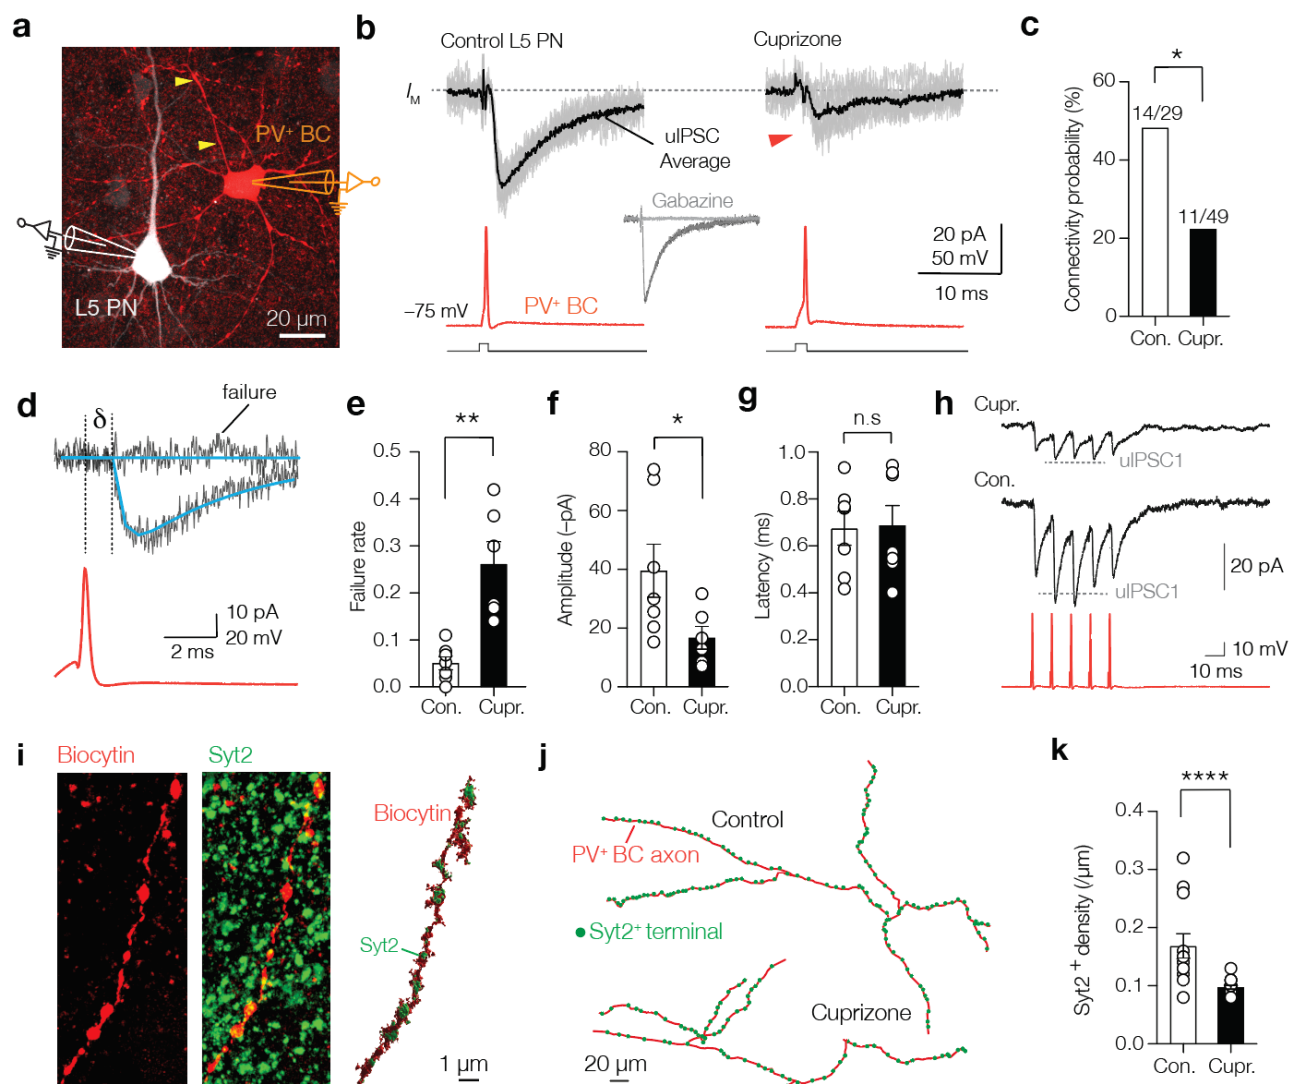

813

814

815

816

817

818

819

820

821

822

823

824

825

826

827

828

829

### Fig. 3. Decreased reliability, connectivity, and facilitation of PV<sup>+</sup> unitary IPSCs

(a) Immunofluorescence image of a connected control PV<sup>+</sup> BC (red) and L5 PN (white). (b) Example traces of ten single trial uIPSC traces (gray) overlaid with mean average (>60 trials, black). Inset, uIPSCs abolished by gabazine (GABA<sub>A</sub> blocker, 4  $\mu$ M). (c) Cuprizone-treated mice show significantly lower connection probability between PV<sup>+</sup> BC and L5-PN. (d) Example fits (blue) of uIPSCs for rise- and decay time, amplitude, failure rate, amplitude and latency analyses ( $\delta$ , AP to 10% uIPSC peak amplitude). (e, f) Cuprizone increased failures by 5-fold and the average peak amplitude by ~2.5-fold. (g) uIPSCs latency remained unchanged. (h) Cuprizone impairs short-term facilitation. Dotted line indicates expected amplitude for uIPSC<sub>2</sub> (scaled from uIPSC<sub>1</sub>). (i) *Left*, confocal z-projected image of a control PV<sup>+</sup> axon (red) immunostained with Syt2 (green). *Right*, surface rendered 3D-image of the same axon. (j) Example sections of 3D reconstructions. (k) Cuprizone reduced Syt2<sup>+</sup> bouton density by ~2-fold. Data shown as mean  $\pm$  SEM and open circles individual axons or pairs. n.s., not significant.

830

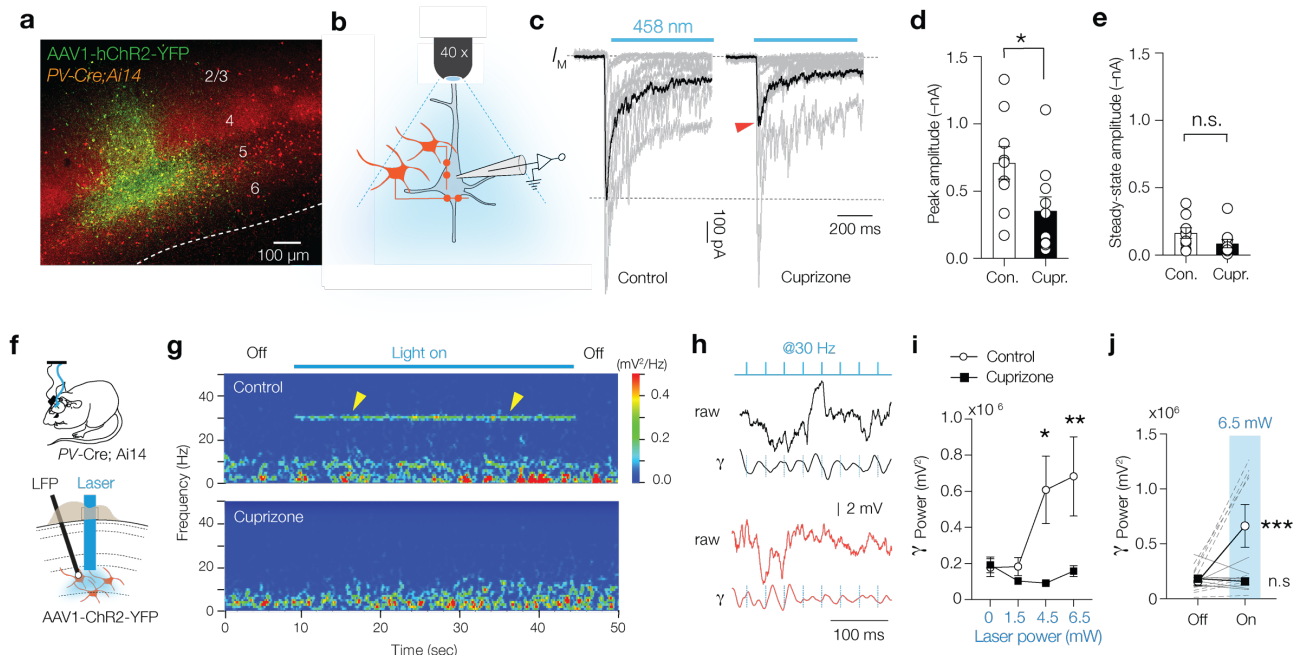

831

832

833

834

835

836

837

838

839

840

841

842

843

844

845

846

847

848

849

850

851

852

853

854

855

#### Fig. 4. Impaired phasic PV<sup>+</sup> mediated inhibition and gamma entrainment

(a) Immunofluorescent image of AAV1-hChR2-YFP expression (green) in L5. (b) schematic showing full-field blue light optogenetically-evoked postsynaptic inhibitory currents (oIPSCs) in L5 PNs. (c, d) Single trial oIPSCs (gray) from different experiments (1 sec duration pulses) overlaid with the average oIPSC (black), revealing a ~2-fold reduction in oIPSCs peak amplitude (red arrow). (e) Steady-state oIPSCs amplitude did not reach significance. (f) Schematic for chronic LFP recordings and *in vivo* optogenetic stimulation in freely moving *PV-cre;Ai14* mice. (g) Time frequency plot showing low gamma frequency ( $\gamma$ ) entrainment (1-ms blue light pulse at 30 Hz) in control but not in cuprizone mice. (h) raw LFP (*top*) and band pass filtered trace (25–40 Hz, *bottom*) from control and cuprizone during low- $\gamma$  entrainment. (i) Population data of  $\gamma$  power with increasing laser power reveals impaired  $\gamma$  in cuprizone-treated mice. (j) Myelin deficient mice show lack of low- $\gamma$  band during optical entrainment. Data are shown as mean  $\pm$  SEM with gray lines individual cells (D, E), gray lines individual mice (J). n.s., not significant.

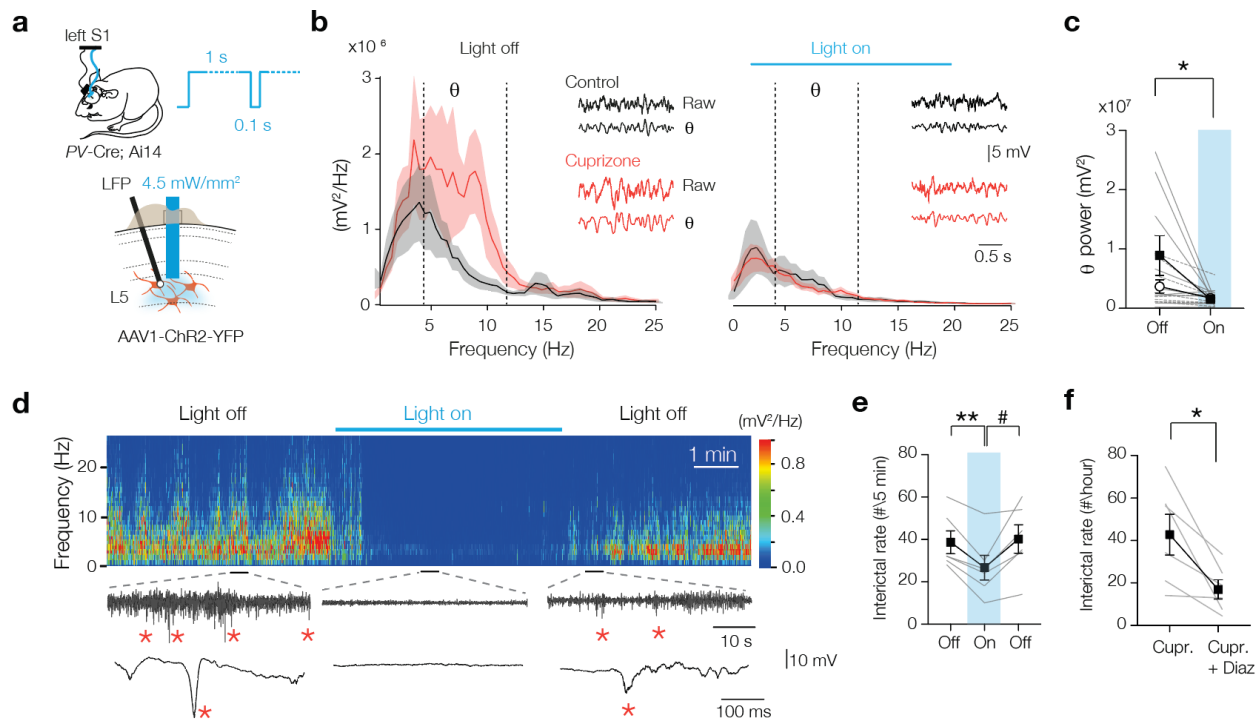

**Fig. 5. Optogenetic activation of myelin deficient PV<sup>+</sup> interneurons rescues theta rhythm and interictal epileptiform discharges**

(a) Schematic drawing for chronic LFP and optogenetic stimulation in freely moving mice. A 1 sec blue light pulse with 100 ms off periods activated PV<sup>+</sup> interneurons. Blue light was switched on during high interictal activity (>10 spikes/min). (b) power spectral content collected from 2 sec epoch windows in control (black) and cuprizone (red) before (left) and during 3 min (right) optogenetic activation of PV<sup>+</sup> interneurons. *Insets*, raw LFP signals (top) and  $\theta$  content (bottom) in control (black) and cuprizone (red) condition. (c) Population data showing amplified  $\theta$  frequency content suppressed to control levels during optogenetic activation of PV<sup>+</sup> cells. (d) Example time frequency plot (top) and raw LFP traces (below) showing suppression of interictal spikes during light on conditions. See also **Movie S2**. (e) Population data of transient optogenetic suppression of the interictal activity in 8 weeks-cuprizone treated mice. (f) 2 mg/kg i.p injection of diazepam (diaz) in cuprizone-treated mice reduces interictals for at least 10 hours. Data show mean  $\pm$  SEM and grey lines individual mice.

856

857

858

859

860

861

862

863

864

865

866

867

868

869

870

871

872

873



Supplementary information

**Myelin speeds cortical oscillations by consolidating phasic  
parvalbumin-mediated inhibition**

Mohit Dubey<sup>1</sup>, Maria Pascual-Garcia<sup>3</sup>, Koke Helmes<sup>1</sup>, Dennis D. Wever<sup>1</sup>, Mustafa S.  
Hamada<sup>1, 2</sup>, Steven A. Kushner<sup>3</sup> and Maarten H. P. Kole<sup>1, 2, \*</sup>

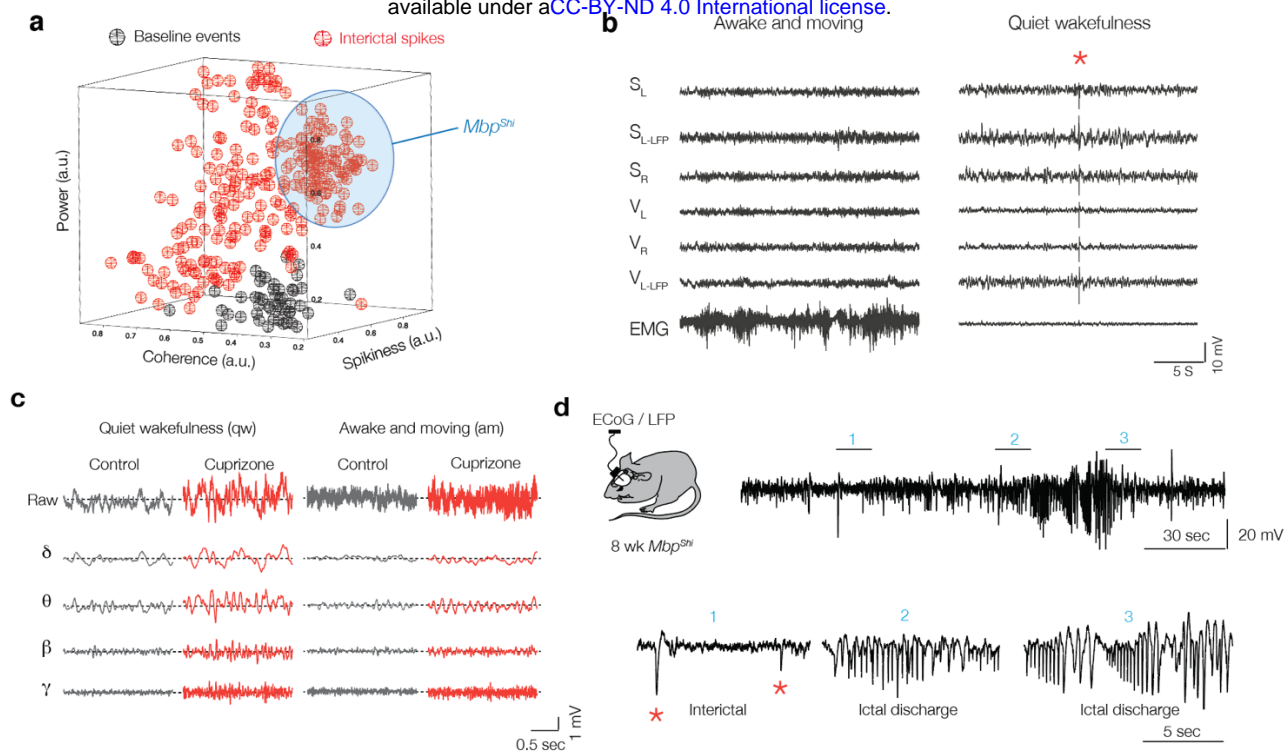

### Fig. S1. State-dependent interictal activity in cuprizone mice and automated interictal event detection library

(a) Automated event detection library used for interictal classification. Three-dimensional projection metric space, showing coherence, spikiness and signal power (a.u. = arbitrary units), with colors corresponding to interictal (red) and baseline/normal (black) events. The event library was constructed by an operator who classified events as “normal” or interictal events. The blue area represents the population of interictal events from  $Mbp^{Shi}$  mice. (b) Example of a 30 s recording from multiple electrodes from 6 weeks-cuprizone treated mouse. *Left*, traces during the awake state, note the high voltage EMG activity. *Right*, same mouse during quiet wakefulness with low EMG activity. Interictal discharge indicated with red asterisk (\*). (c) Example traces showing raw LFP signals from S1 (top) and bandpass filtered traces (bottom) at different brain states in control (black) and cuprizone (red) for delta ( $\delta$ , 0.5–3.5 Hz), theta ( $\theta$ , 4–12 Hz), beta ( $\beta$ , 12.5–25 Hz) and gamma ( $\gamma$ , 30–80 Hz). (d) Schematic drawing showing ECoG and LFP recordings from S1 of  $Mbp^{+/+}$  and  $Mbp^{Shi}$  mice. Example LFP trace showing pre-ictal and ictal discharge from 8 weeks old  $Mbp^{Shi}$  mouse (top). Bottom, higher temporal resolution from the top LFP trace showing pre-ictal discharge with interictals (1) and ictal discharge (2 and 3).

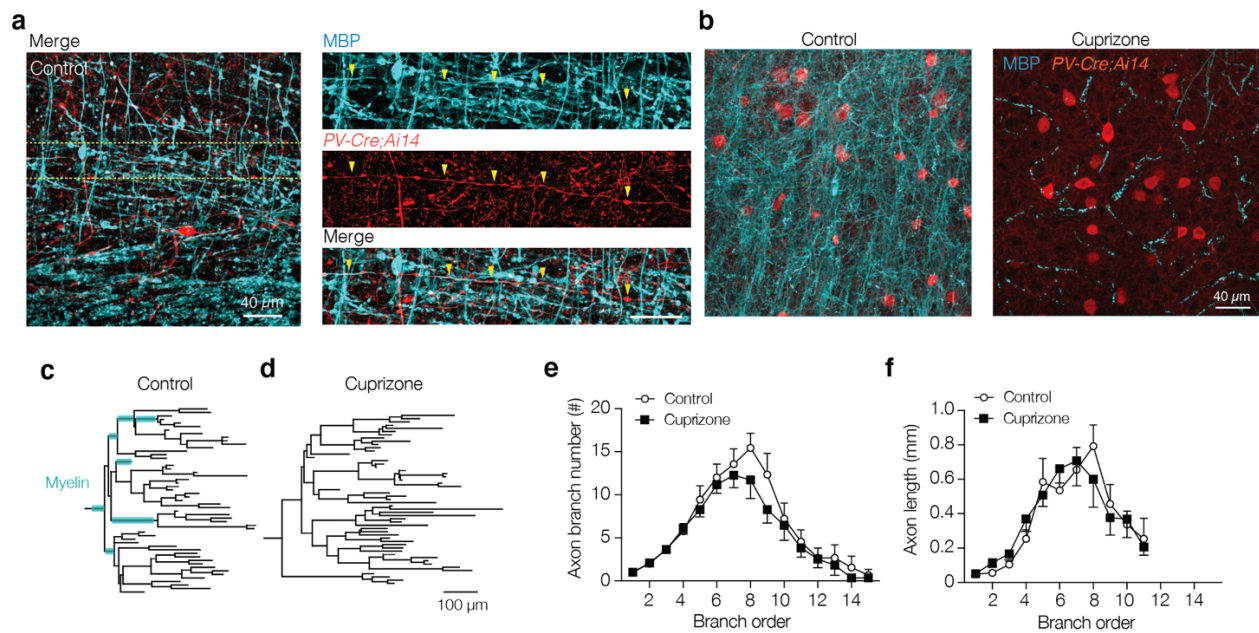

**Fig. S2. Cuprizone-induced demyelination preserves PV<sup>+</sup> axon length and complexity**

(a) *Left*, confocal image of control staining in L5 of S1 showing a PV<sup>+</sup> interneuron. *Right*, higher magnification of the image in *right*, illustrating the trajectory of a myelinated PV<sup>+</sup> interneuron axon (yellow arrows). Note that also PV<sup>+</sup> axon swellings are frequently myelinated. Scale bar, 10  $\mu$ m. (b) A confocal z-stack image examples of the L5 region in control (left) and cuprizone (right) treated mice. (c) Axonograms of a control (left) and cuprizone axon (d, right). Myelinated segments indicated with cyan. (e-f) Number/length per branch order. Axon branch number and segment lengths are not affected with cuprizone-induced demyelination ( $P = 0.8028$  and  $P = 0.6236$ , respectively). Data show mean  $\pm$  SEM.

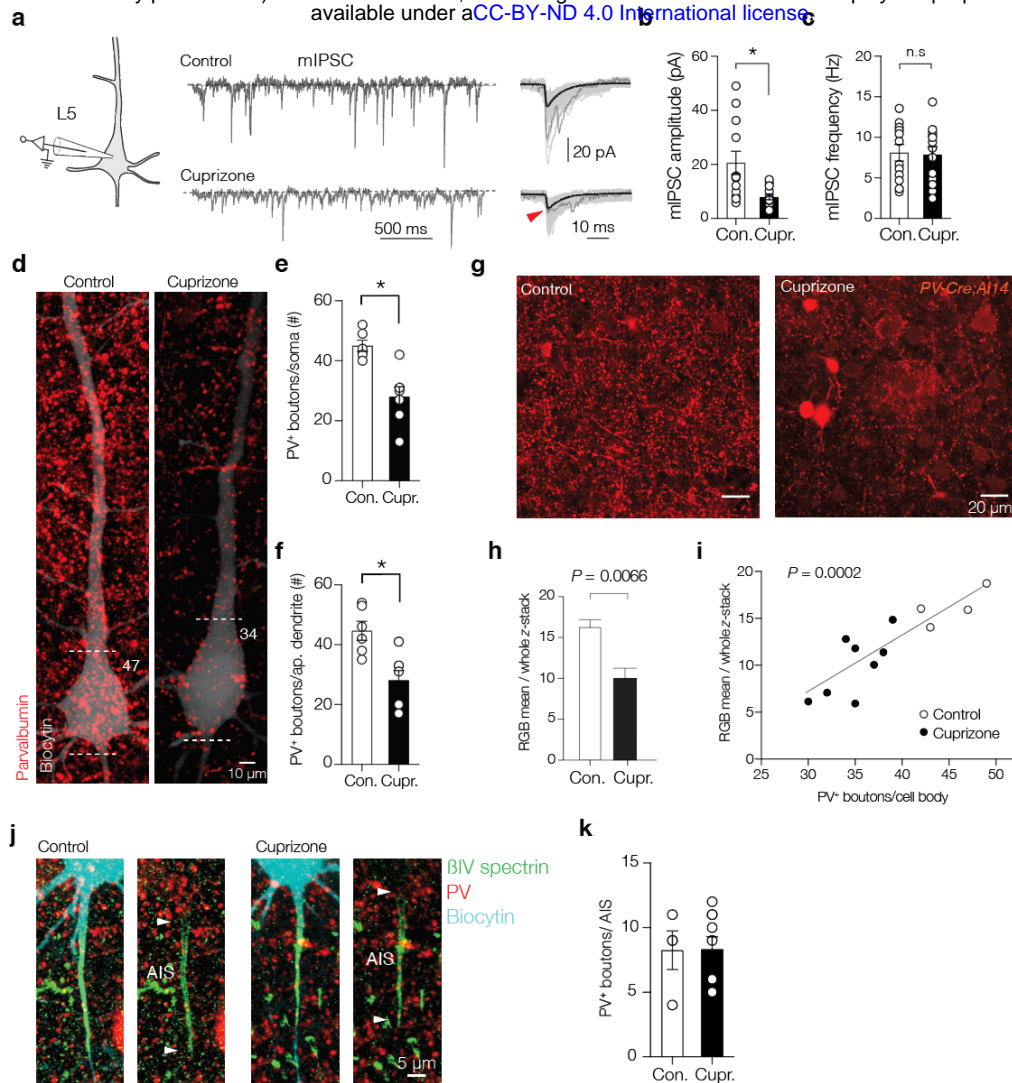

**Fig. S3. Cuprizone decreases miniature IPSCs and somatodendritic PV puncta numbers**  
**(a)** *Left*, Example traces of mIPSCs at the soma of L5 pyramidal neurons in the presence of CNQX, d-AP5 and TTX in control (top) and demyelinated conditions (bottom). **(b)** Population data showing a ~3-fold mIPSC peak amplitude reduction. **(c)** Miniature frequency was unaffected. **(d)** Maximum z-projection of a biocytin filled L5 pyramidal neurons (white) overlaid with PV immunofluorescence (red). Dotted lines indicate the soma borders with number indicating PV<sup>+</sup> puncta. **(e)** Population data showing significant loss in the number of PV<sup>+</sup> puncta at the L5 soma. **(f)** Population analysis of PV<sup>+</sup> puncta at primary proximal apical dendrite (< 200  $\mu$ m) shows a reduced puncta number. **(g, h)** Example confocal z-stack images of L5 in control (left) and cuprizone treated mice (right) reveals a global significant reduction in PV immunofluorescence intensity. **(i)** Regression plot reveals the mean PV immunofluorescence intensity correlates with the number of PV<sup>+</sup> boutons on large NeuN<sup>+</sup> pyramidal neurons cell bodies ( $r^2 = 0.755$ ). NeuN<sup>+</sup> immunofluorescent signals are not shown. The soma diameters of pyramidal neurons were unchanged (cuprizone  $18.23 \pm 0.99 \mu\text{m}$ ,  $n = 6$  vs.  $18.37 \pm 0.68 \mu\text{m}$ , Mann-Whitney U test  $P = 0.954$ ,  $n = 9$ ). **(j)** A confocal z-projection of a biocytin filled (cyan) L5 pyramidal neuron overlaid with  $\beta$ IV spectrin (green). **(k)** putative chandelier PV<sup>+</sup> boutons were preserved in cuprizone-treated mice. Data are shown as mean  $\pm$  SEM with open circles individual neurons. n.s., not significant.

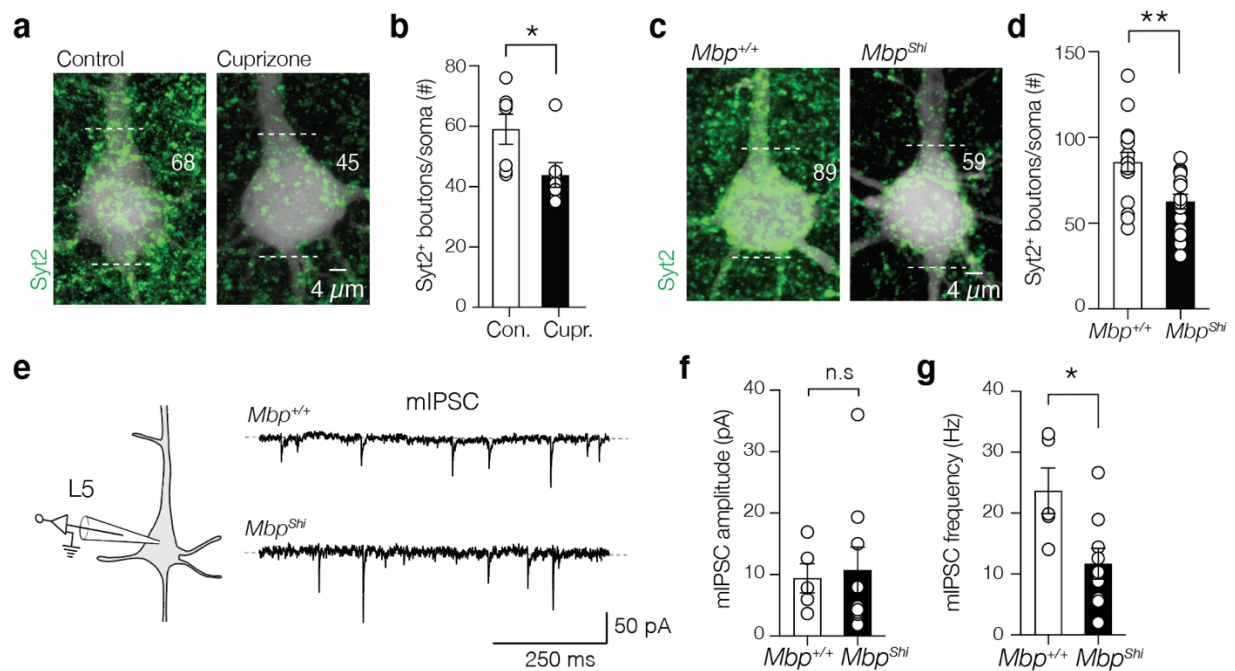

**Fig. S4. Demyelination and dysmyelination reduces miniature IPSCs and perisomatic Syt2<sup>+</sup> puncta**

(a) Maximum z-projection of biocytin-filled L5 PN (white) overlaid with Syt2<sup>+</sup> immunofluorescence (green). Numbers indicate the Syt2<sup>+</sup> puncta. (b) Population analysis of Syt2<sup>+</sup> puncta reveal a significant loss in cuprizone. (c) Maximum z-projection of a biocytin filled L5 soma (white) overlaid with Syt2<sup>+</sup> immunofluorescence (green) from *Mbp*<sup>+/+</sup> and *Mbp*<sup>Shi</sup> mice. (d) Population analysis shows a significant loss of Syt2<sup>+</sup> puncta in the *Mbp*<sup>Shi</sup> mice. (e) Example traces of mIPSCs of L5 PN in the presence of CNQX, d-AP5 and TTX in *Mbp*<sup>+/+</sup> (top) and *Mbp*<sup>Shi</sup> mice (bottom). (f, g) mIPSCs peak amplitude was unaffected but frequency is reduced in *Mbp*<sup>Shi</sup> (\**P* = 0.019). Data are shown as mean ± SEM with open circles individual neurons. n.s., not significant.

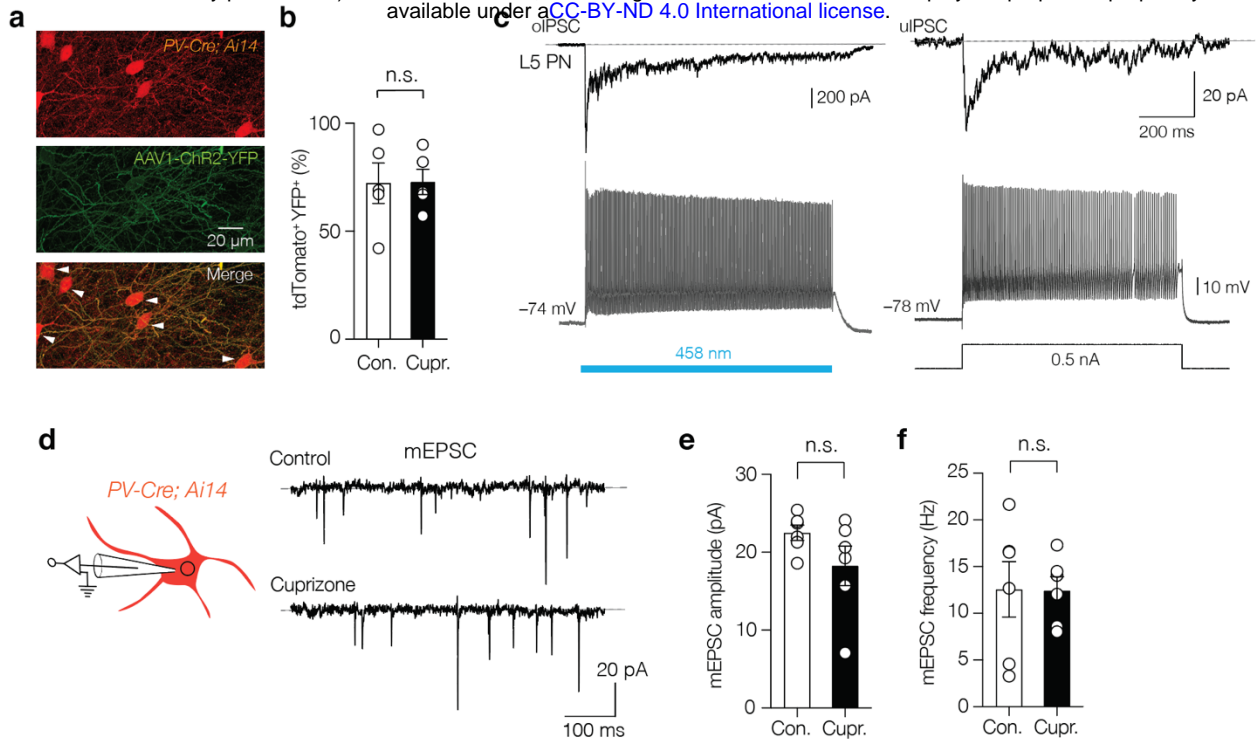

**Fig. S5. Optogenetically evoked PV<sup>+</sup> IPSC resemble unitary IPSCs and excitatory drive of PV BCs remains unaffected**

(a) confocal image of separate fluorescent channels showing td-Tomato<sup>+</sup> cell bodies and neurites (red), the localization of AAV1-hChR2-YFP (green) and the merge image. The majority of tdTomato<sup>+</sup> cells were YFP<sup>+</sup> (white arrows). (b) Population data of average transfection rate (>70%) of AAV1-hChR2-YFP in the L5 in both control and cuprizone conditions. (c) *Left*, whole-cell current-clamp recording from a PV<sup>+</sup> interneurons (bottom) overlaid with separate oIPSC recordings from a L5 PN. A 1 sec blue light field illumination (blue bar) produces sustained firing in PV-Cre AAV1-ChR2 interneurons. *Right*, paired recording of uIPSC in a L5 PN connected with a PV<sup>+</sup> interneuron revealing a similar brief uIPSC facilitation for the first spikes followed by synaptic depression during a 700 ms train of action potentials. (d) *Left*, schematic of whole-cell voltage-clamp recording for mEPSCs in identified parvalbumin interneurons in the PV-Cre; Ai14 mouse line. mEPSCs were recorded in control mice and mice with 6-weeks cuprizone feeding. (e, f) Population data of mEPSC recordings revealed no difference in amplitude nor in the mEPSC frequency. Data show mean ± SEM with open circles individual interneurons. n.s., not significant.

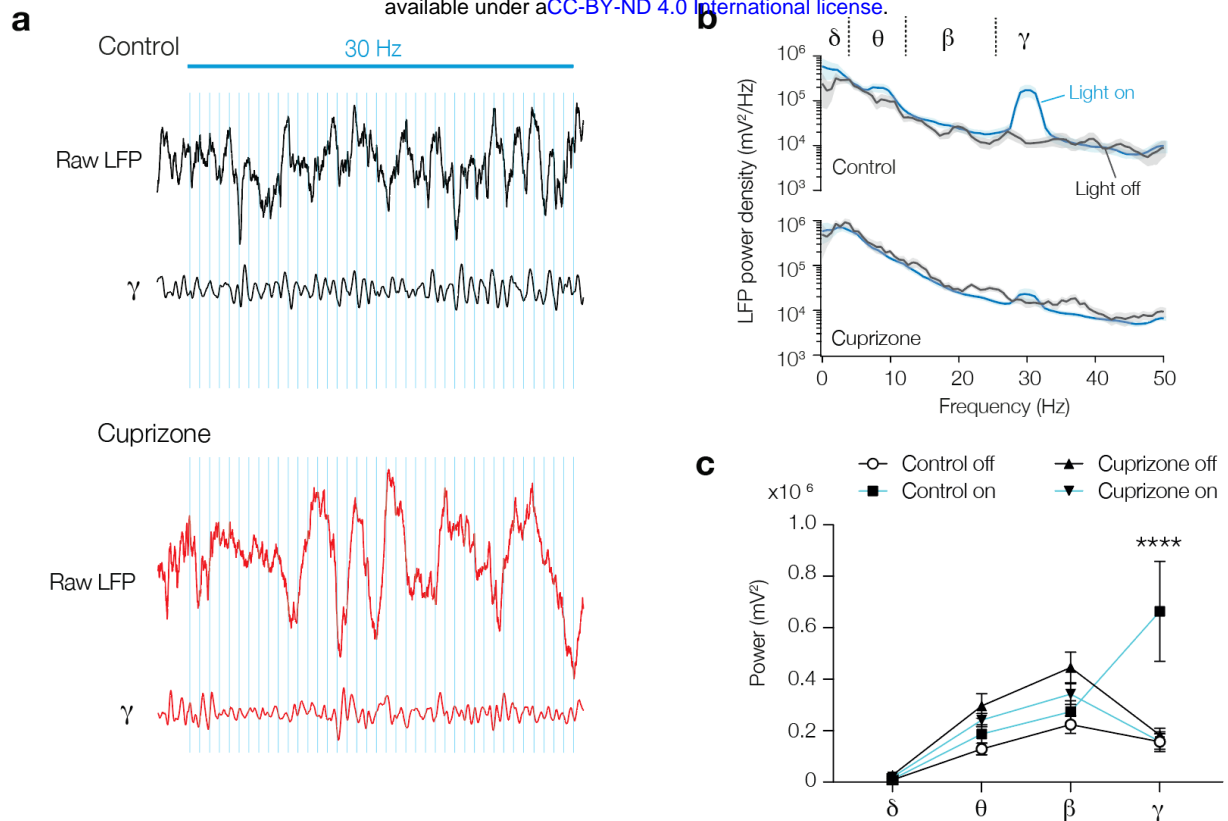

**Fig. S6. Myelin loss abolishes optogenetically evoked entrainment of  $\gamma$  rhythm**

(a) Raw LFP and low gamma ( $\gamma$ ) 25-40 Hz band-pass filtered trace during 30 Hz blue light stimulation in control (black) and cuprizone (red) mice. Blue light shifted the phase or extended the  $\gamma$  cycle in control mice. (b) Averaged power spectral density content of low- $\gamma$  entrainment during *light on* (blue lines) or *off* (black lines). (c) 30 Hz blue light stimulation showed a lack of  $\gamma$  band entrainment in cortex of demyelinated mice in comparison to the significantly increased  $\gamma$  power in control mice. Data show mean  $\pm$  SEM.

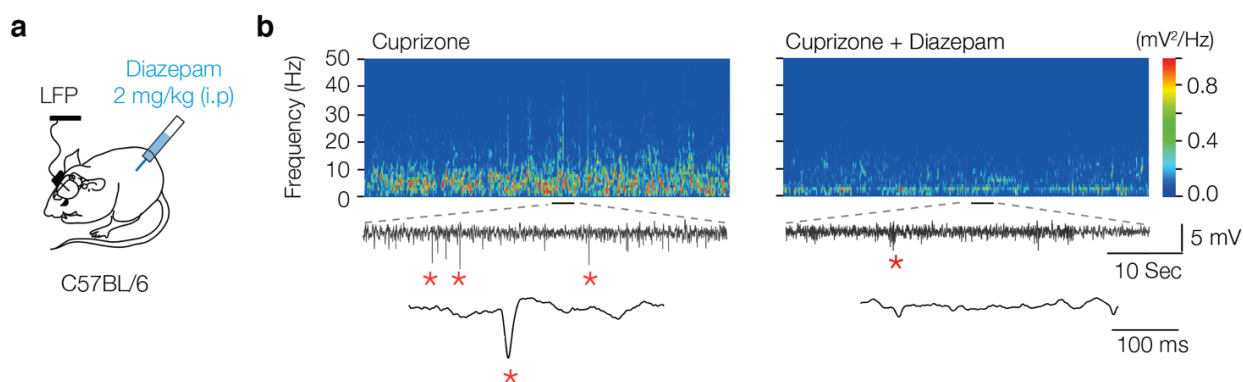

**Fig. S7. GABA<sub>A</sub> receptor agonism suppresses interictal epileptiform discharge frequency**

(a) The GABA<sub>A</sub> receptor agonist, diazepam, was injected i.p. at 7 weeks of cuprizone treatment, and LFP recordings performed 10 hours post diazepam injection (b) Example time frequency plot before (*left*) and after diazepam injection (*right*) showing suppression of interictal epileptiform discharges in cuprizone-treated mice.



## Supplementary Table S1. Electrophysiological properties of PV interneurons

|                  | Steady state               |                           | Action potential           |                            |                           |                           |                                        |
|------------------|----------------------------|---------------------------|----------------------------|----------------------------|---------------------------|---------------------------|----------------------------------------|
|                  | RMP<br>(mV)                | $R_N$<br>(M $\Omega$ )    | Rheobase<br>(pA)           | Threshold<br>(mV)          | Half-width<br>(ms)        | Amplitude<br>(mV)         | Rate-of-rise<br>(mV ms <sup>-1</sup> ) |
| <b>Control</b>   | -78.68 ± 1.07<br>(42 / 21) | 133.3 ± 8.55<br>(42 / 21) | 207.1 ± 12.33<br>(42 / 21) | -40.51 ± 0.97<br>(34 / 12) | 0.290 ± 0.01<br>(34 / 12) | 78.12 ± 1.66<br>(34 / 12) | 527 ± 35.38<br>(34 / 12)               |
| <b>Cuprizone</b> | -83.29 ± 0.93<br>(27 / 13) | 125 ± 8.96<br>(27 / 13)   | 295.3 ± 18.65<br>(27 / 13) | -43.65 ± 1.29<br>(15 / 7)  | 0.295 ± 0.01<br>(15 / 7)  | 80.13 ± 2.48<br>(15 / 7)  | 492 ± 45.57<br>(15 / 7)                |
|                  | ** $P=0.0036$              | $P=0.5952$                | *** $P=0.0003$             | * $P=0.0269$               | $P=0.7113$                | $P=0.4358$                | $P=0.4455$                             |

Summary data showing the mean ± s.e.m from ( $n$  cells and  $N$  mice). Rheobase, Input resistance ( $R_N$ ) and resting membrane potential (RMP) were obtained from voltage recordings with 700-ms current injections. Action potential (AP) properties were determined based on 3-ms duration current injection and voltage thresholds starting with a delay in the offset transient.  $P$  values indicate two-tailed Mann-Whitney U tests.

## Supplementary Table 2. Figure statistics

See Excel file

### **Movie S1. Brain-state dependent interictal spikes**

Example video of ECoG, LFP and behavioral recordings in a 6-weeks cuprizone treated mouse. Raw signals show ECoG from right and left primary somatosensory cortex ( $S_R$ ,  $S_L$ , respectively) and LFP from the left layer 5 region ( $S_{L-LFP}$ ). Similar configuration for primary visual cortex ( $V_R$ ,  $V_L$  and  $V_{L-LFP}$ ). An additional electrode was connected to the neck muscle recording electromyography (EMG). Note the high EMG activity during awake and moving states. Interictal epileptiform discharges was automatically detected (red asterisks) and only occur during quiet wakefulness.

### **Movie S2. Optogenetic activation of myelin-deficient $PV^+$ interneurons suppresses interictal spikes**

Example video of ECoG, LFP and behavioral recordings in a 7-weeks cuprizone treated mouse. Raw signals show ECoG from right primary somatosensory cortex ( $S_R$ ) and LFP from the layer 5 region ( $S_{R-LFP}$ ). Interictal epileptiform discharges (red asterisks) were suppressed during laser-induced optogenetic activation of  $PV^+$  interneurons in layer 5.
